# Supplementary material
Source: publisher site journal article supplement (https://www.dovepress.com/get_supplementary_file.php?f=375281.docx)
Supplement: Supplementary file 1 [file get_supplementary_file.php]

## Supplement

### **Supplementary** Figure

**
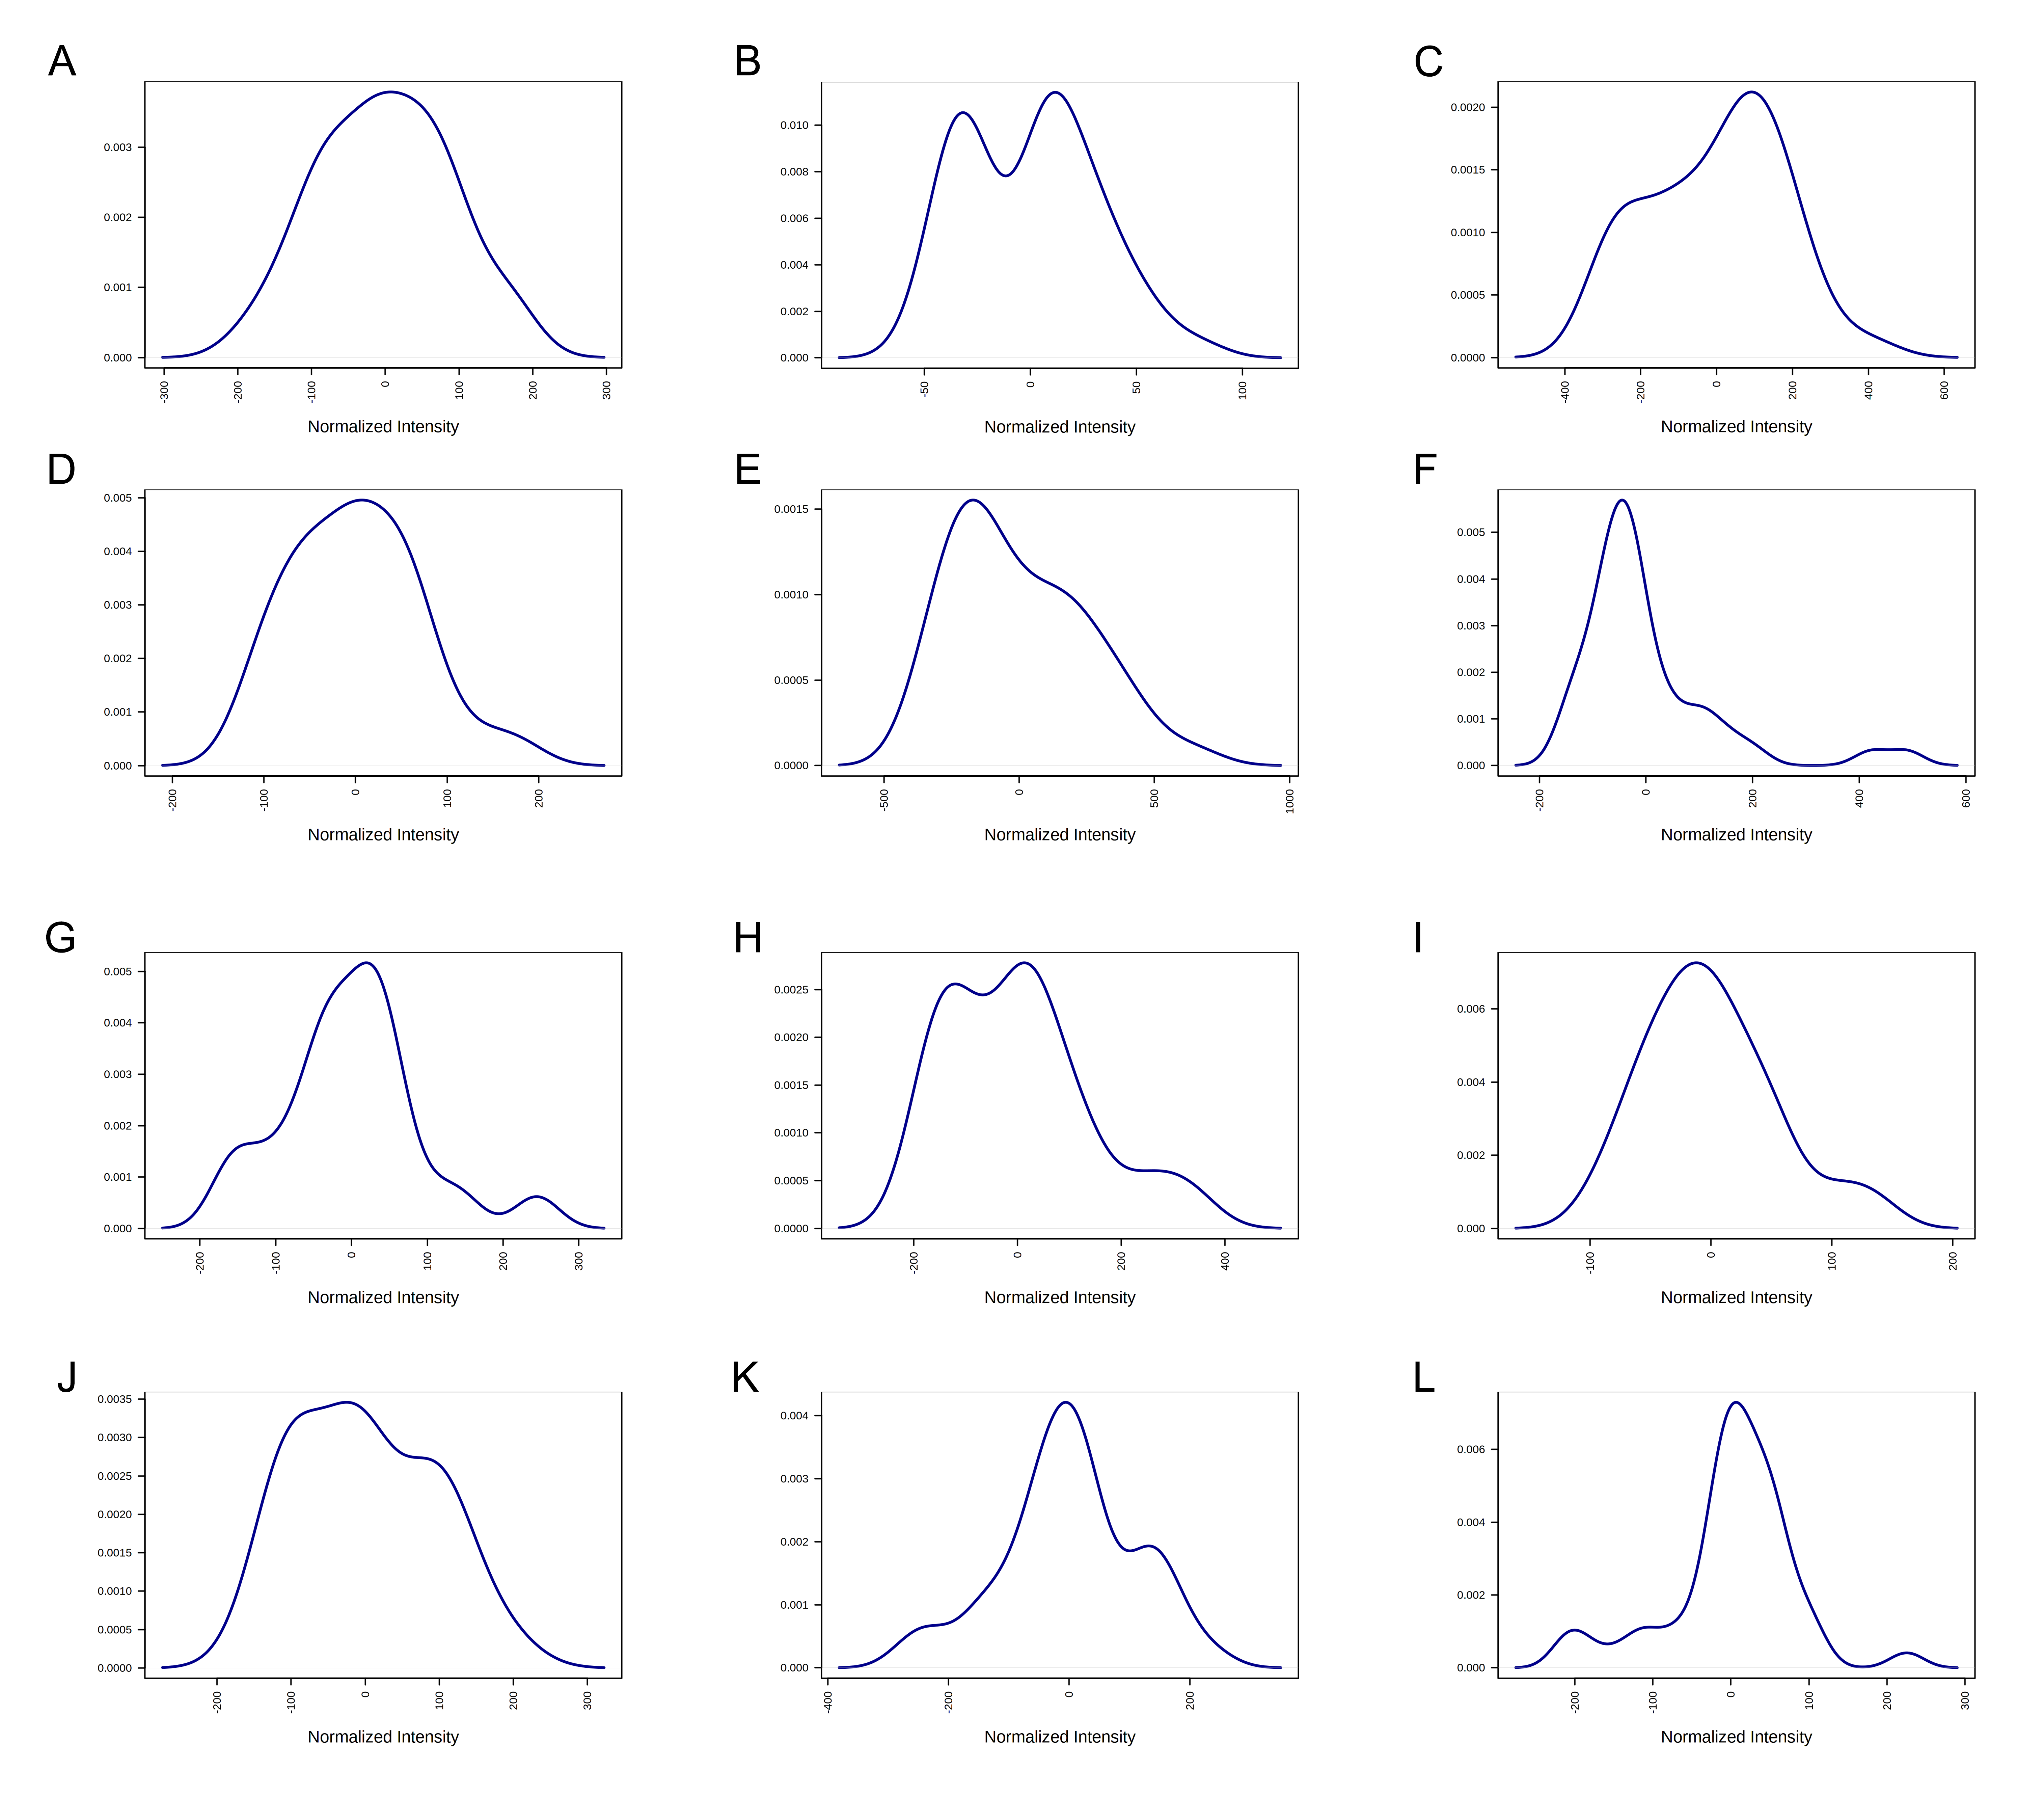
**

**Figure S1** Data distribution plots for normalized fecal samples (A-H), urine samples (I, J) as well as serum samples (K, L) in positive and negative modes, respectively. (A-H) Data distribution plots for normalized fecal samples during the day 0 (A, B), day 7 (C, D), day 10 (E, F) and day 14 (G, H). The former one is in positive mode, the latter one is in negative mode. **
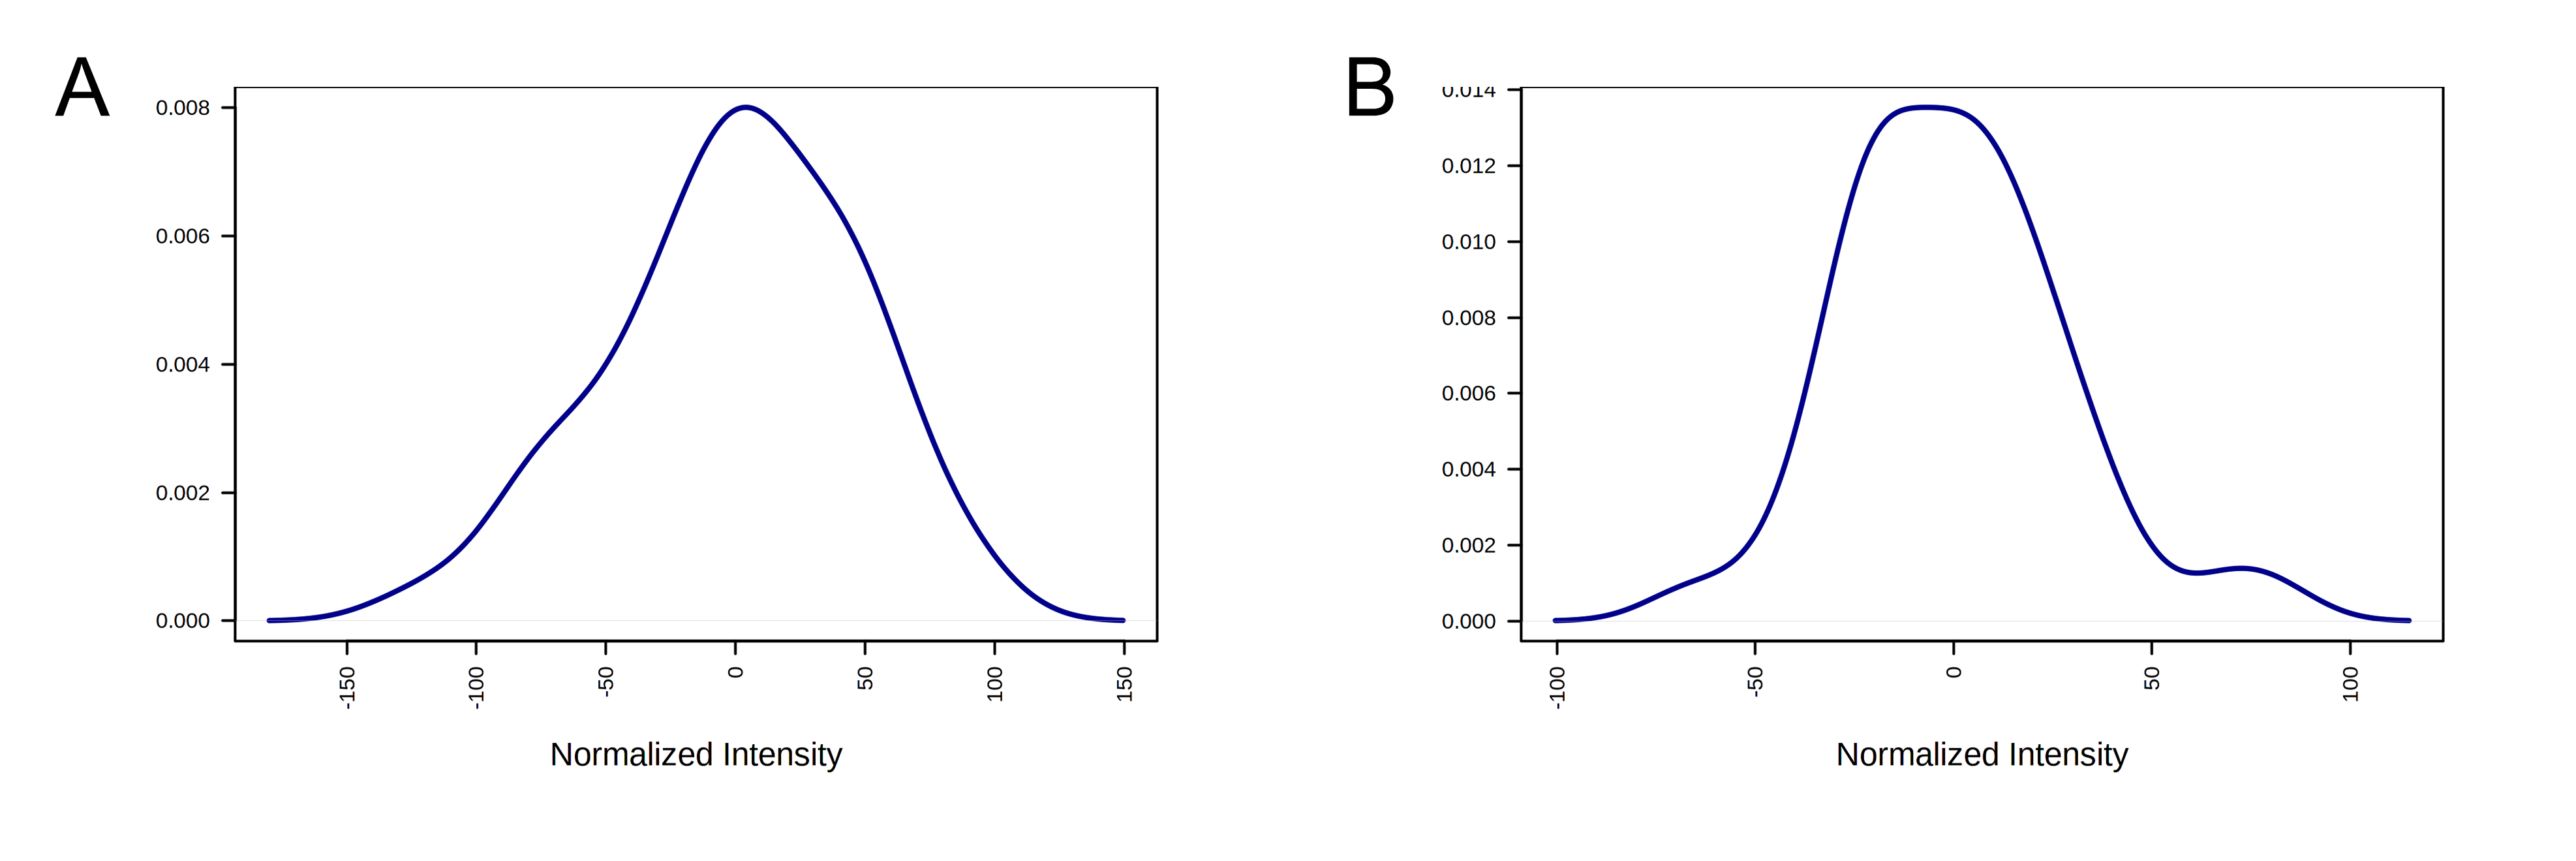
**

**Figure S2** Data distribution plots of normalized liver samples in positive (A) and negative (B) modes.


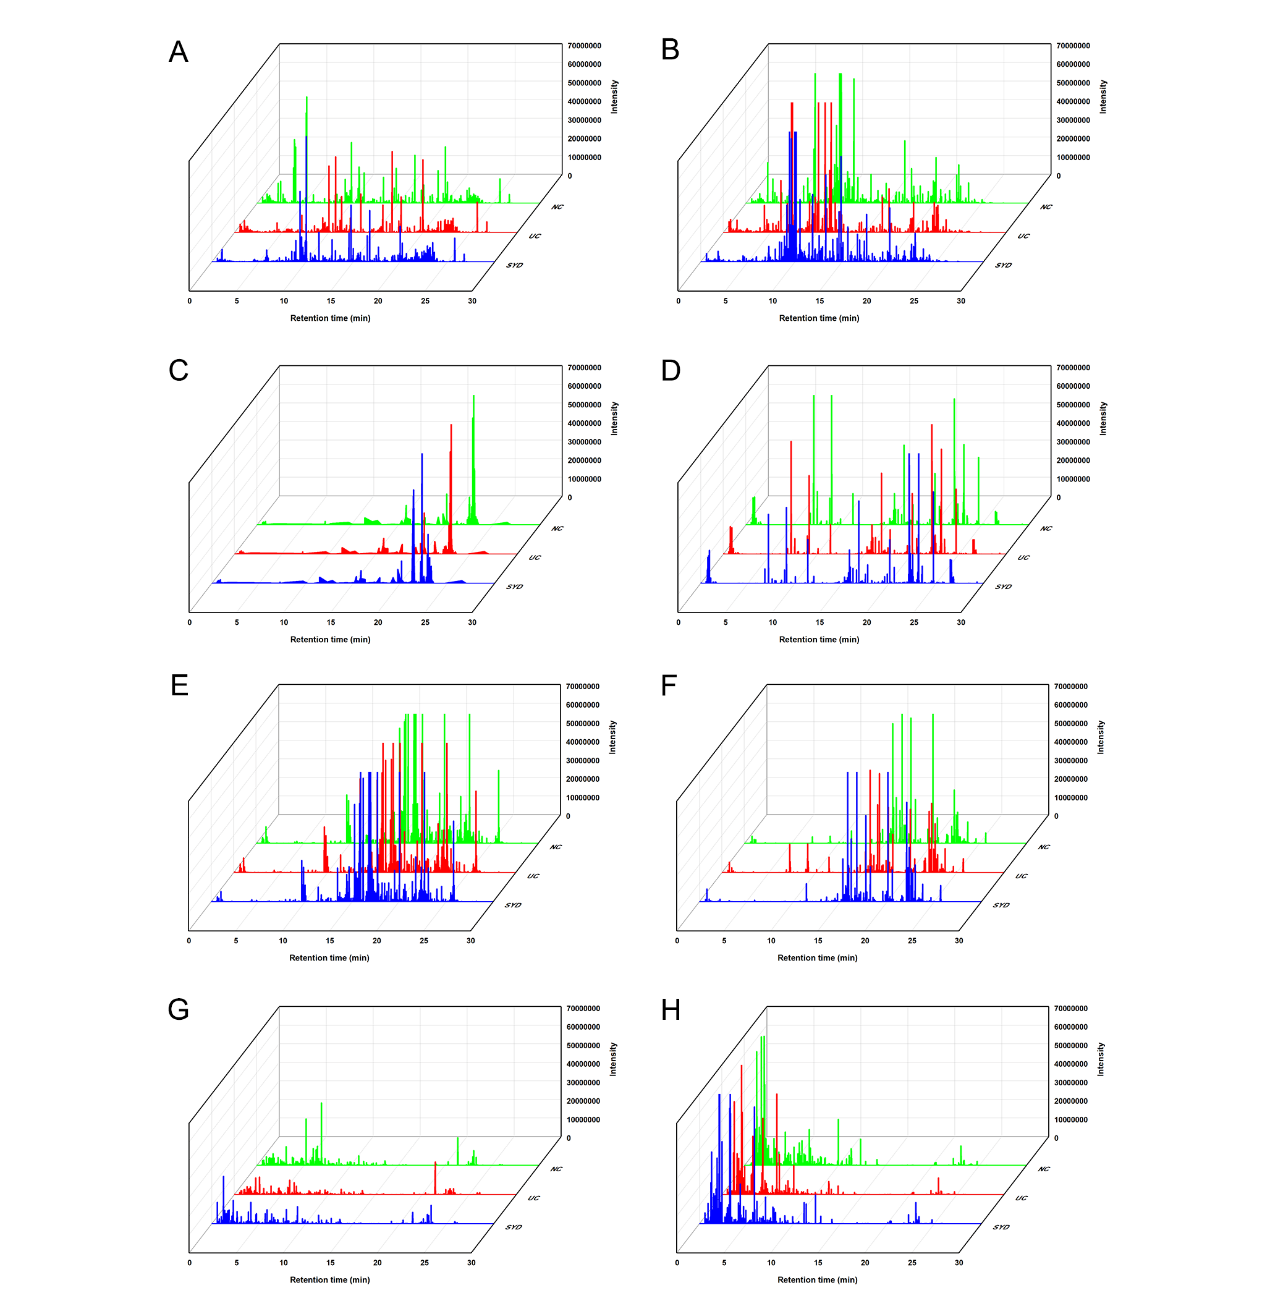


Figure S3 Total Ion chromatograms (TICs) for the metabolomics analysis in mice feces, livers, serum and urine. (A) Feces in positive mode. (B) Feces in negative mode. (C) Livers in positive mode. (D). Livers in negative mode. (E) Serum in positive mode. (F) Serum in negative mode. (G) Urine in positive mode. (H) Urine in negative mode.


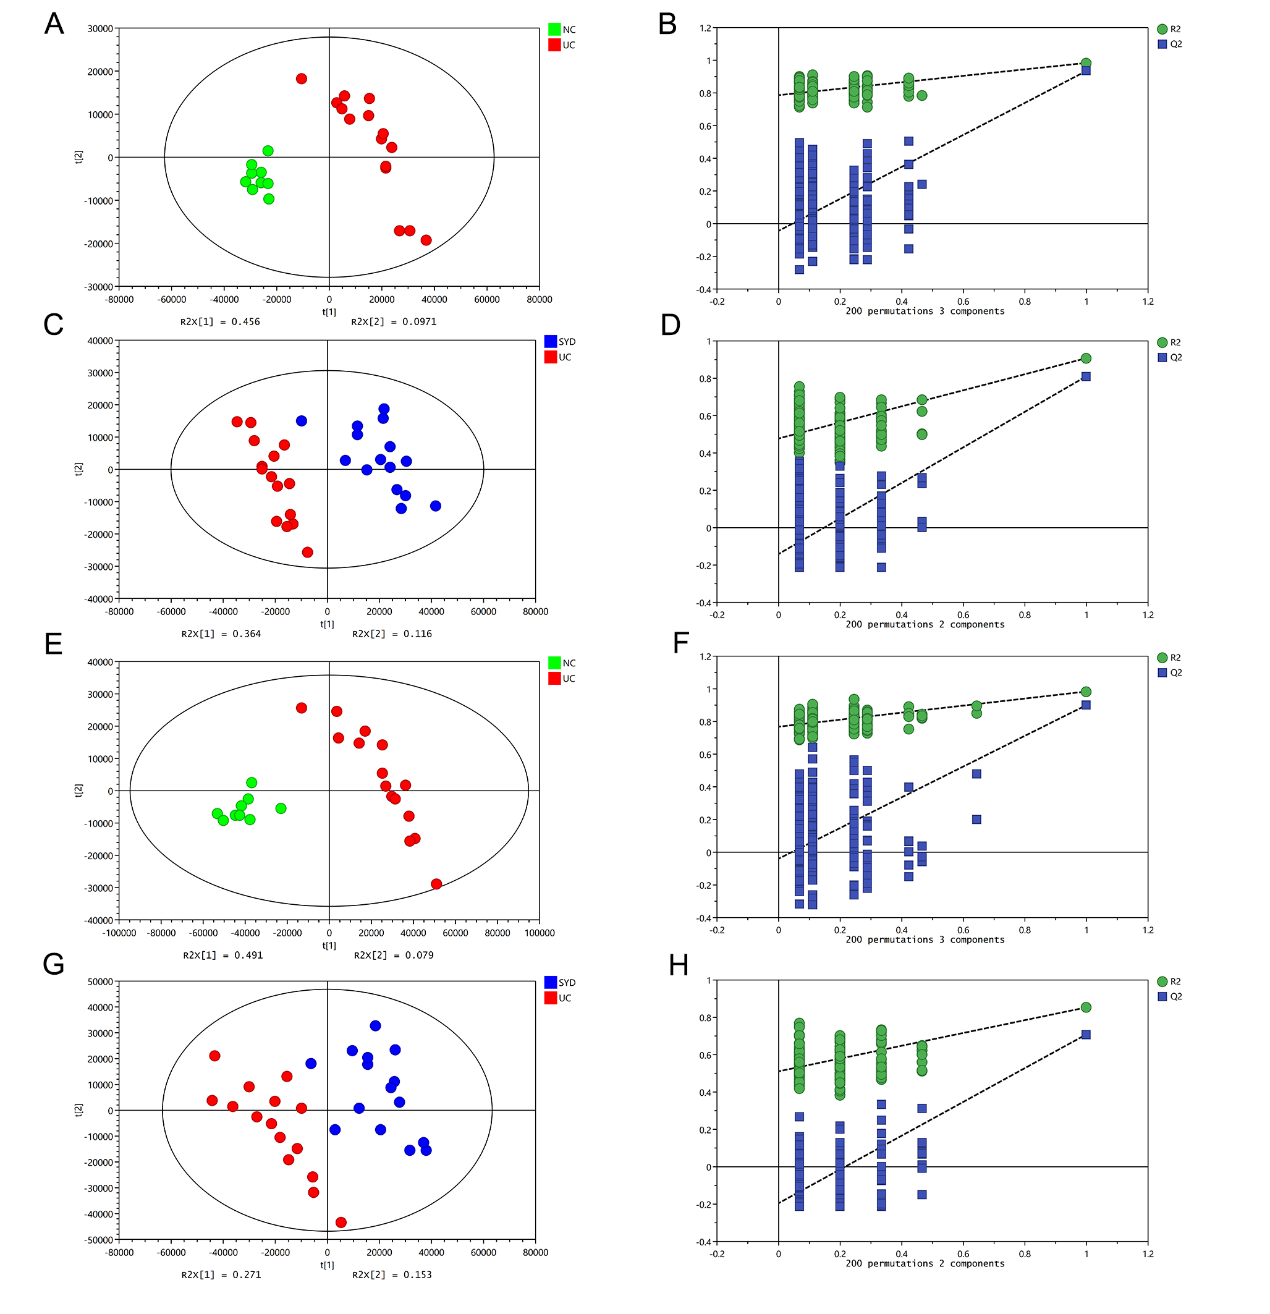


**Figure S4** Metabolite changes in fecal samples. (A, B) PLS‐DA plot of the normal and model groups in positive mode. (C, D) PLS‐DA plot of the SYD and model groups in positive mode. (E, F) PLS‐DA plot of the normal and model groups in negative mode. (G, H) PLS‐DA plot of the SYD and model groups in negative mode. (B, D, F, H) Validation of the PLS‐DA model by the 200‐time permutation test.


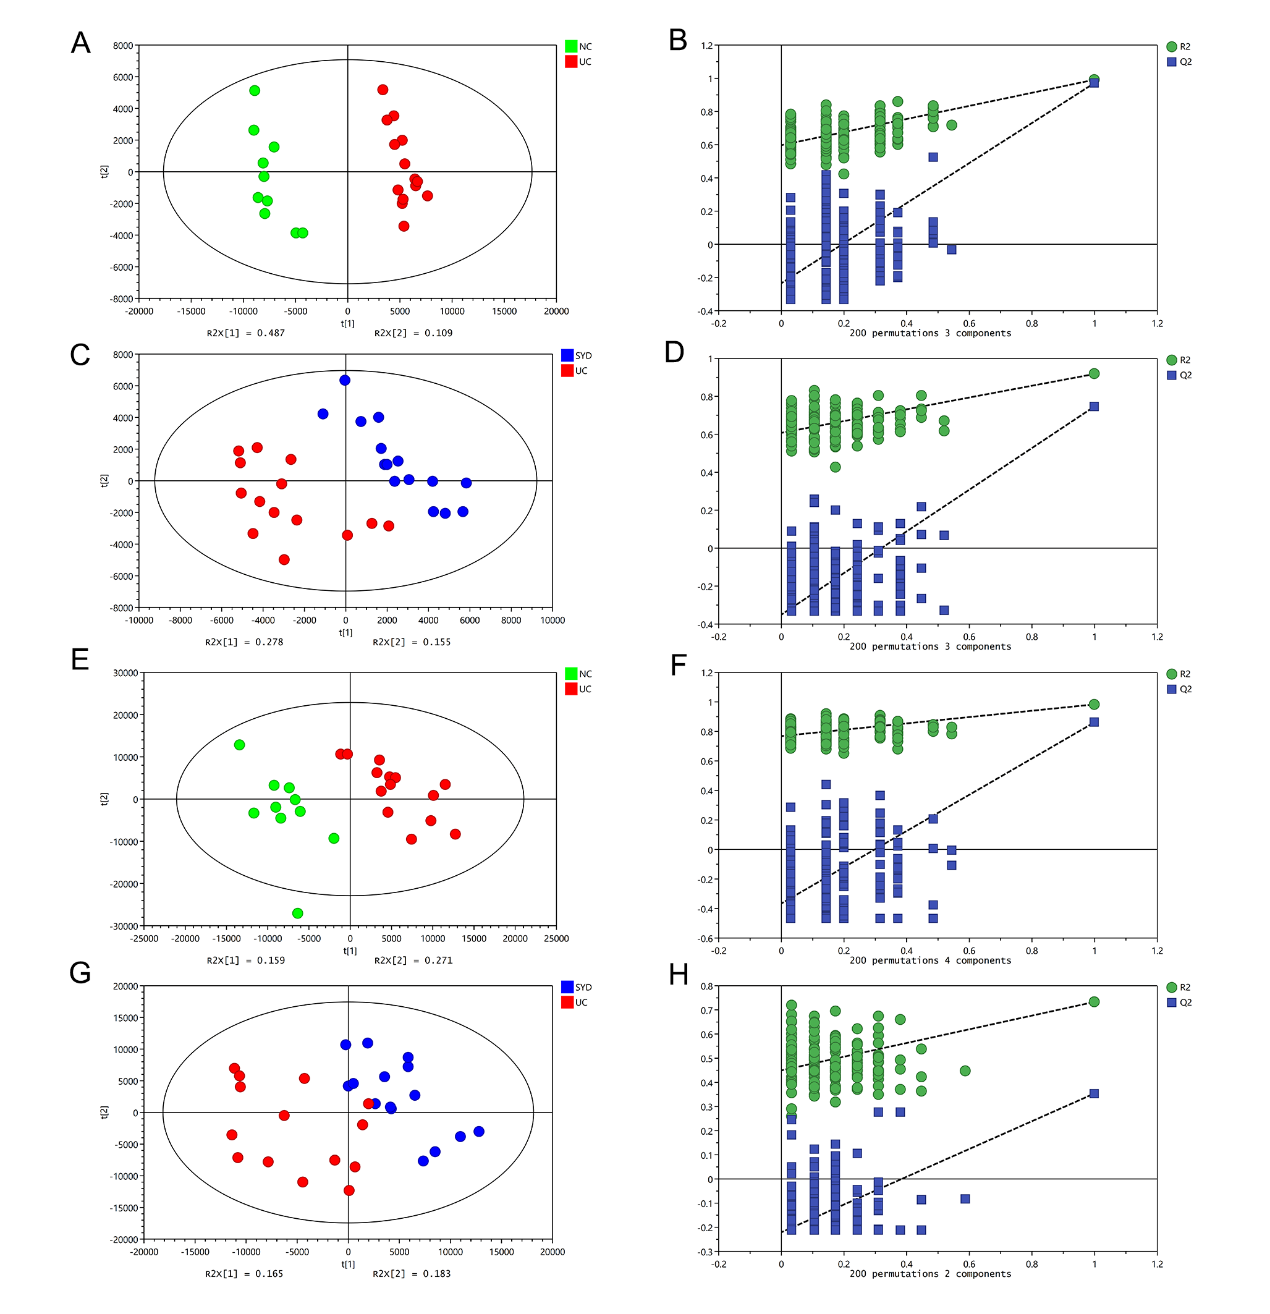


**Figure S5** Metabolite changes in liver tissues. (A, B) PLS‐DA plot of the normal and model groups in positive mode. (C, D) PLS‐DA plot of the SYD and model groups in positive mode. (E, F) PLS‐DA plot of the normal and model groups in negative mode. (G, H) PLS‐DA plot of the SYD and model groups in negative mode. (B, D, F, H) Validation of the PLS‐DA model by the 200‐time permutation test.

**
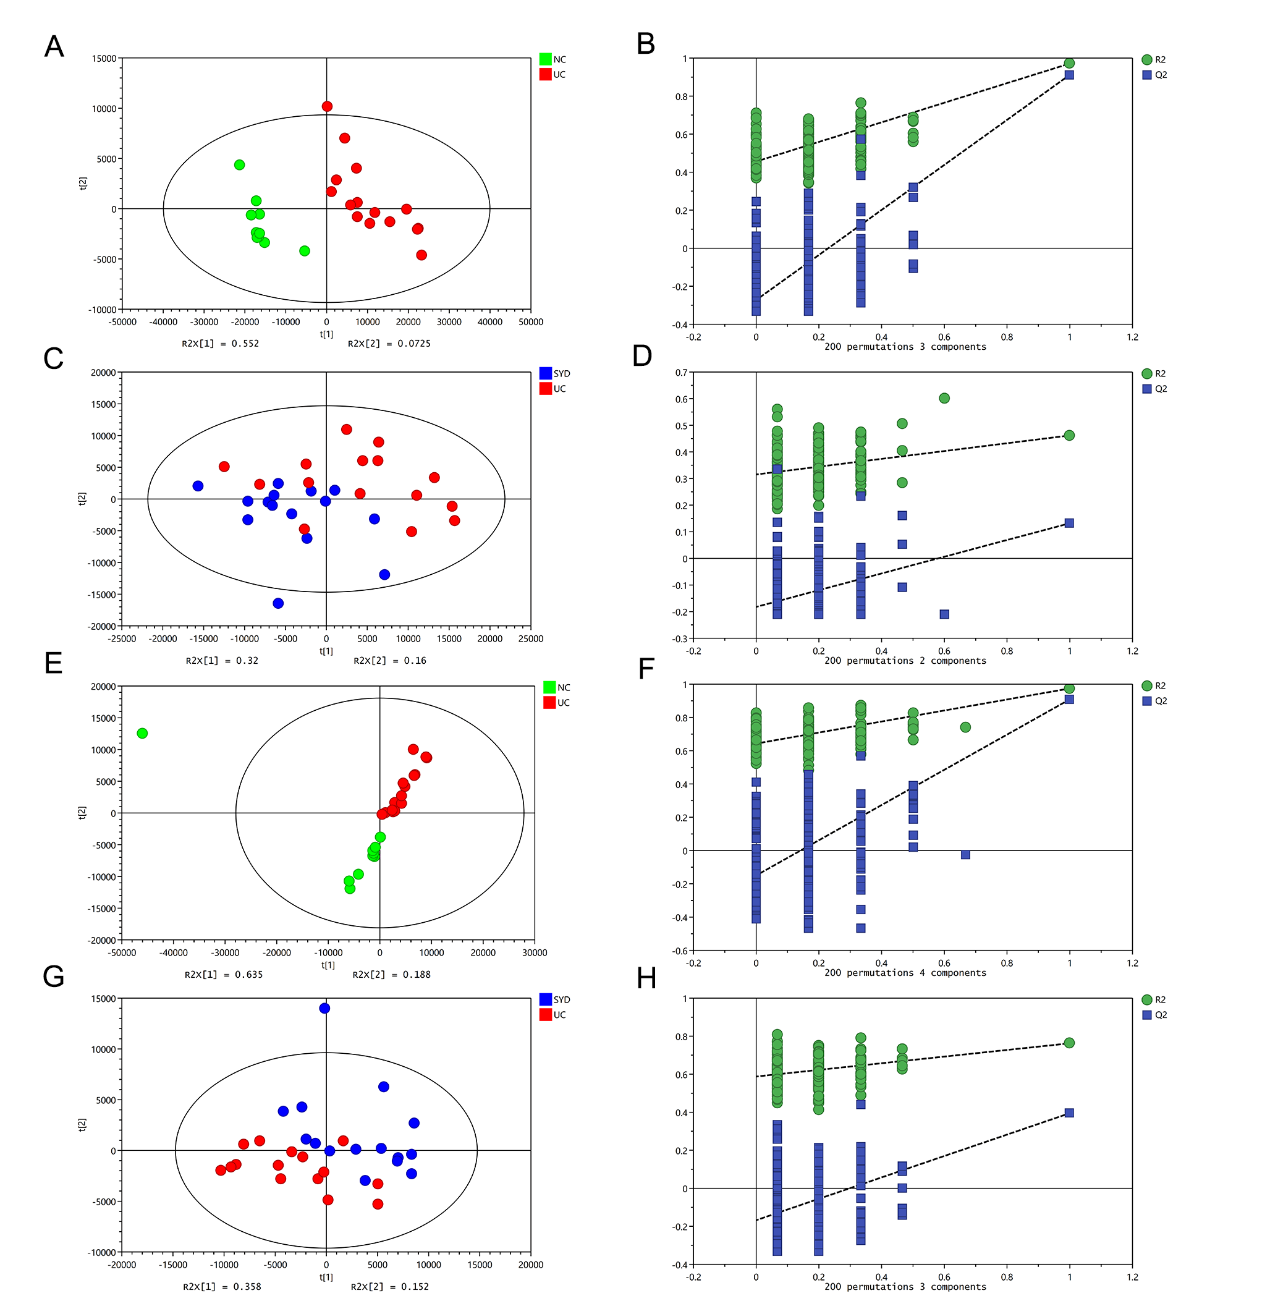
**

**Figure S6** Changes in sera metabolites. (A, B) PLS‐DA plot of the normal and model groups in positive mode. (C, D) PLS‐DA plot of the SYD and model groups in positive mode. (E, F) PLS‐DA plot of the normal and model groups in negative mode. (G, H) PLS‐DA plot of the SYD and model groups in negative mode. (B, D, F, H) Validation of the PLS‐DA model by the 200‐time permutation test.

**
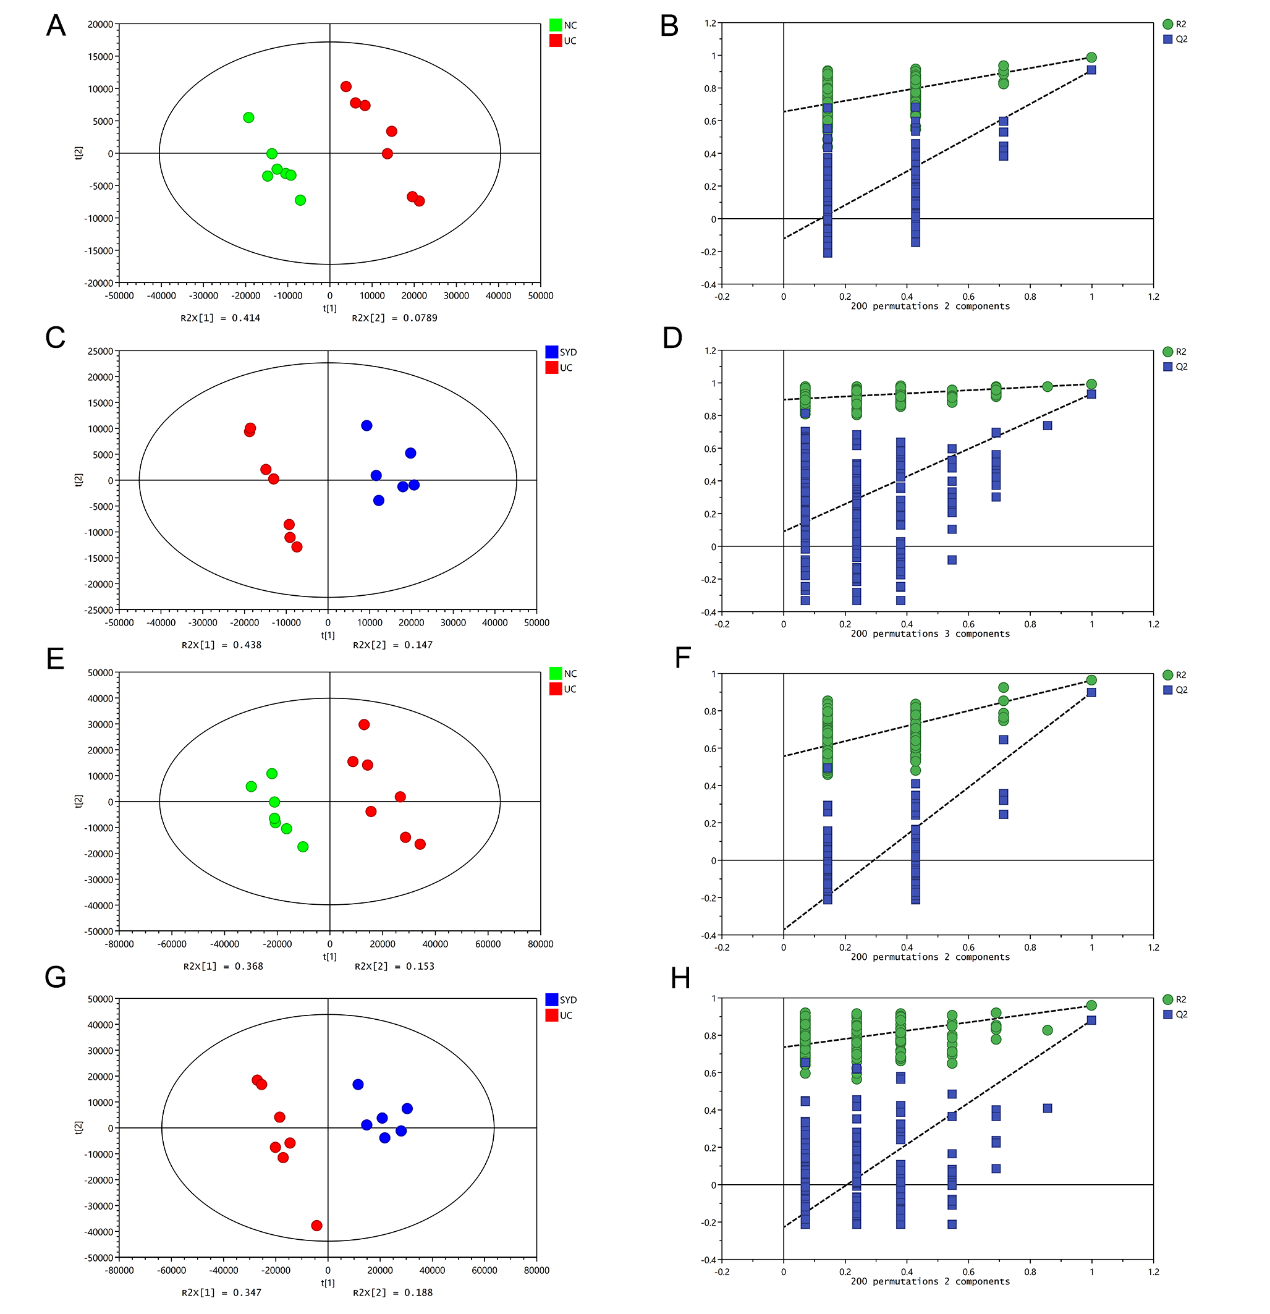
**

**Figure S7** Changes in urine metabolites. (A, B) PLS‐DA plot of the normal and model groups in positive mode. (C, D) PLS‐DA plot of the SYD and model groups in positive mode. (E, F) PLS‐DA plot of the normal and model groups in negative mode. (G, H) PLS‐DA plot of the SYD and model groups in negative mode. (B, D, F, H) Validation of the PLS‐DA model by the 200‐time permutation test.


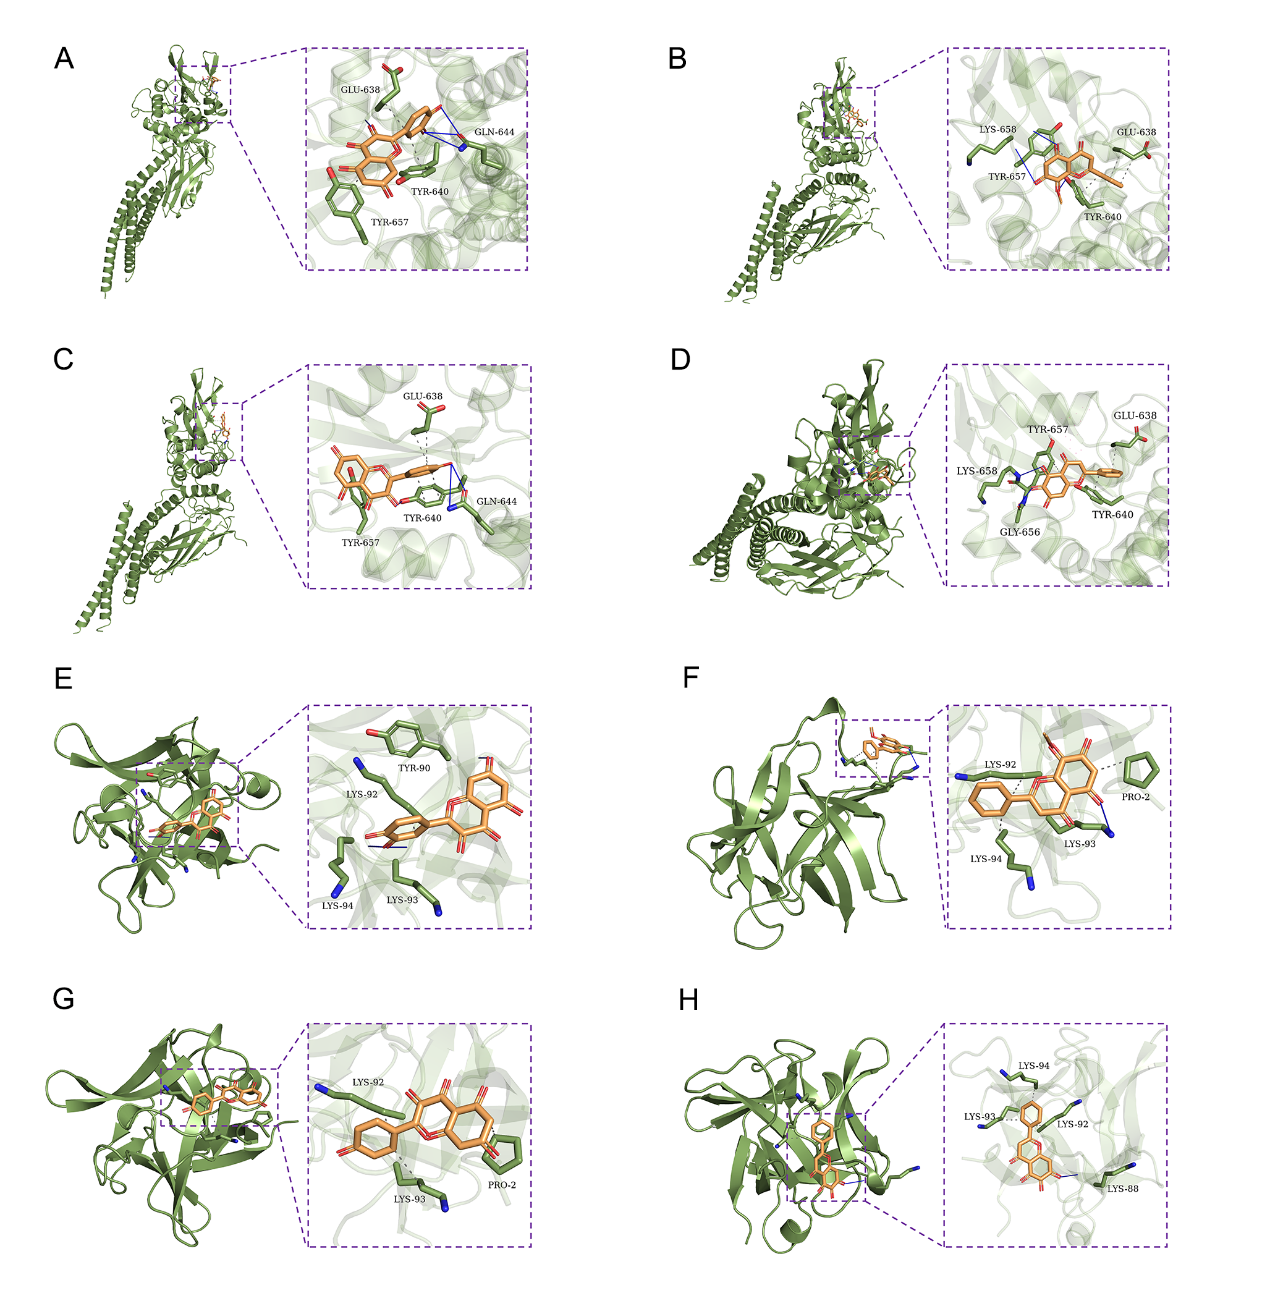


**Figure S8** Molecular docking models of STAT3 and IL1B binding to quercetin, wogonin, kaempferol, baicalein, respectively. (A) Stable complex formed by quercetin and STAT3. (B) Stable complex formed by wogonin and STAT3. (C) Stable complex formed by kaempferol and STAT3. (D) Stable complex formed by baicalein and STAT3. (E) Stable complex formed by quercetin and IL1B. (F) Stable complex formed by wogonin and IL1B. (G) Stable complex formed by kaempferol and IL1B. (H) Stable complex formed by baicalein and IL1B.


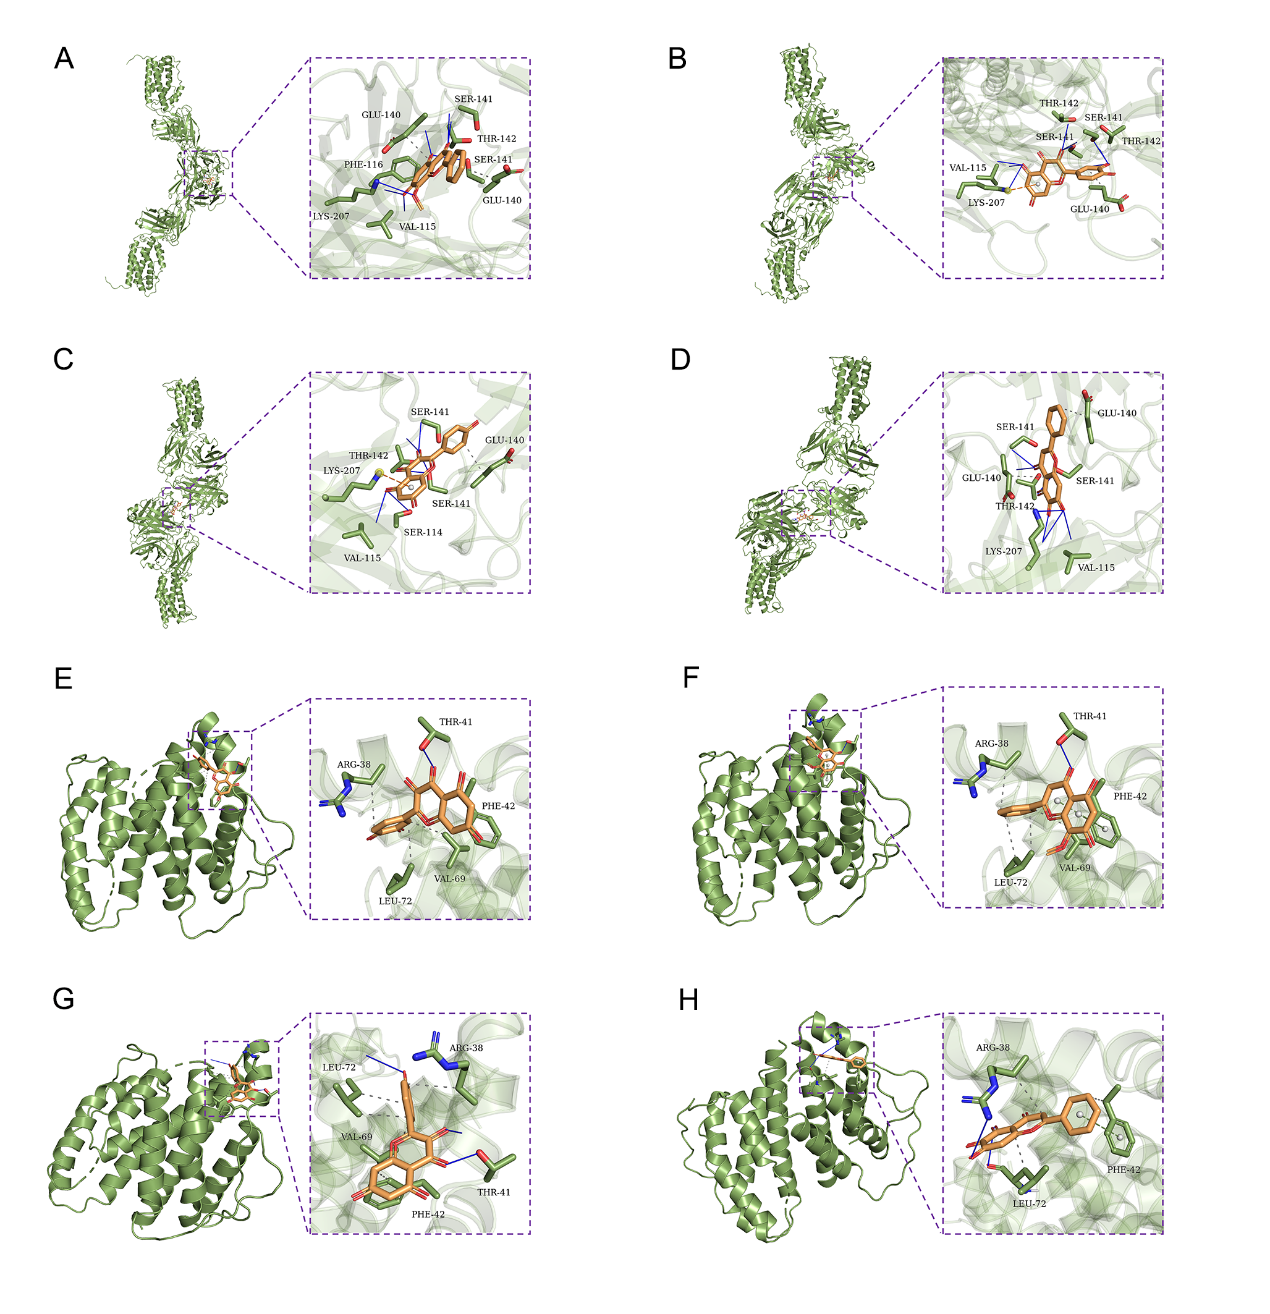


**Figure S9** Molecular docking models of IL6 and IL2 binding to quercetin, wogonin, kaempferol, baicalein, respectively. (A) Stable complex formed by quercetin and IL6. (B) Stable complex formed by wogonin and IL6. (C) Stable complex formed by kaempferol and IL6. (D) Stable complex formed by baicalein and IL6. (E) Stable complex formed by quercetin and IL2. (F) Stable complex formed by wogonin and IL2. (G) Stable complex formed by kaempferol and IL2. (H) Stable complex formed by baicalein and IL2.


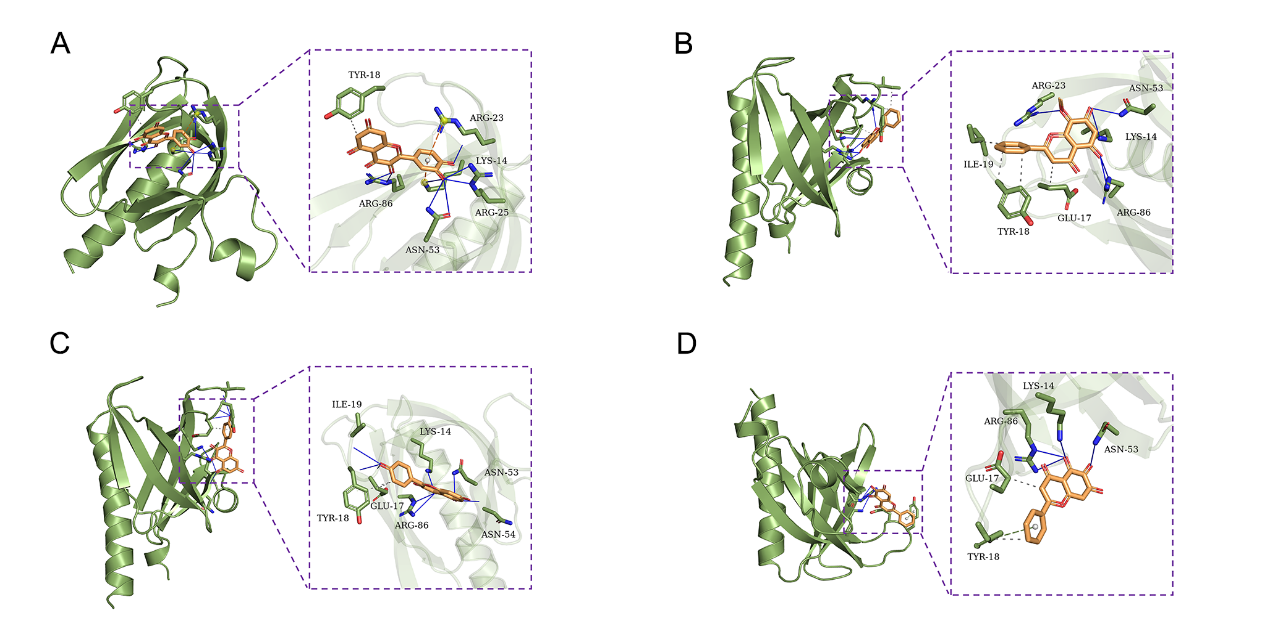


**Figure S10** Molecular docking models of AKT1 binding to quercetin (A), wogonin (B), kaempferol (C), baicalein (D), respectively.

### Supplementary Table

**Table S1. Identification results of the main altered metabolites in feces**

| **Retention time (min)** | **m/z** | **Adducts** | **Formula** | **Mass Error (ppm)** | **Isotope Similarity** | **Compound** |
| --- | --- | --- | --- | --- | --- | --- |
| 0.62 | 158.98 | M-H2O-H | C6H10S3 | 2.88 | 94.65 | Allitridin |
| 0.75 | 195.05 | M-H2O-H | C10H14O3S | 4.28 | 91.93 | Ethyl 3-[(2-furanylmethyl)thio]propanoate |
| 0.79 | 290.09 | M-H2O-H, M-H | C11H19NO9 | -2.91 | 94.65 | N-Acetylneuraminic acid |
| 1.47 | 563.14 | M-H | C26H28O14 | -0.78 | 94.98 | Apiin |
| 1.95 | 287.19 | M-H2O-H, M-H | C15H28O5 | 1.58 | 97.37 | 6-Hydroxypentadecanedioic acid |
| 10.00 | 975.48 | M+Cl | C45H82O16P2 | 3.56 | 90.92 | PIP(16:0/20:3(5Z,8Z,11Z)) |
| 10.05 | 487.46 | M+Cl | C31H64O | -2.50 | 96.64 | 15-Hentriacontanol |
| 10.06 | 997.46 | M-H | C49H74O21 | -2.84 | 90.16 | (S)-Nerolidol 3-O-[a-L-Rhamnopyranosyl-(1->4)-a-L-rhamnopyranosyl-(1->2)-[4-(4-hydroxy-3-methoxycinnamoyl)-(E)-a-L-rhamnopyranosyl-(1->6)]-b-D-glucopyranoside] |
| 10.11 | 487.24 | M-H | C24H40O8S | -2.22 | 70.22 | 7-Sulfocholic acid |
| 10.46 | 959.52 | M+H, M+Na, M+H-H2O | C48H78O19 | -4.00 | 96.79 | Soyasaponin V |
| 10.54 | 957.51 | M-H, M+FA-H, M+Cl | C48H78O19 | -1.12 | 94.47 | Soyasaponin A3 |
| 10.68 | 531.30 | M-H | C27H48O8S | -1.74 | 93.28 | 5b-Cyprinol sulfate |
| 10.77 | 451.27 | M+Cl, M+FA-H | C24H38O5 | 1.37 | 93.90 | 7-Ketodeoxycholic acid |
| 10.81 | 1089.55 | M-H, M+Cl, M+FA-H | C52H84O21 | -3.68 | 93.49 | Jujuboside B |
| 10.81 | 987.52 | M-H, M+Cl, M+FA-H, M-H2O-H | C48H78O18 | -1.87 | 94.76 | Soyasaponin I |
| 10.83 | 1009.50 | M-H2O-H, M-H | C51H80O21 | -2.47 | 89.22 | Pisumsaponin I |
| 10.83 | 531.30 | M-H | C30H44O8 | 4.73 | 88.26 | Ganoderic acid I |
| 11.08 | 515.30 | M-H2O-H | C30H46O8 | -1.62 | 95.25 | Ganoderic acid L |
| 11.21 | 423.36 | M+H-H2O, M+H | C30H48O2 | 0.54 | 93.91 | Myricolal |
| 11.29 | 911.50 | M-H, M+Cl, M+FA-H, M-H2O-H | C47H76O17 | -1.11 | 94.29 | Soyasaponin II |
| 11.30 | 795.45 | M-H, M+Cl, M+FA-H | C42H68O14 | -1.23 | 96.31 | Saponin E |
| 11.41 | 329.23 | M+FA-H | C17H32O3 | -1.64 | 96.90 | Avocadyne |
| 11.44 | 819.59 | M+Cl | C49H84O7 | 0.54 | 94.81 | DG(13D5/11D5/0:0) |
| 11.53 | 471.31 | M-H | C29H44O5 | -3.59 | 78.89 | (3beta,17alpha,23R)-17,23-Epoxy-3,29-dihydroxy-27-norlanost-8-ene-15,24-dione |
| 11.60 | 765.44 | M-H, M+FA-H | C41H66O13 | -0.67 | 96.35 | 28-Glucosylsiaresinolate 3-arabinoside |
| 11.70 | 302.31 | M+H-H2O, M+H | C18H39NO2 | 0.27 | 98.09 | Sphinganine |
| 11.90 | 315.25 | M+FA-H | C17H34O2 | -3.24 | 98.09 | Heptadecanoic acid |
| 11.90 | 437.29 | M-H, M+Cl, M+FA-H | C24H40O4 | -2.83 | 98.44 | 3b,12a-Dihydroxy-5a-cholanoic acid |
| 11.97 | 985.50 | M-H, M+Cl, M+FA-H | C48H76O18 | -0.30 | 83.27 | Pisumsaponin II |
| 12.05 | 1083.54 | M-H, M+FA-H | C54H84O22 | 0.59 | 92.43 | AzIV |
| 12.05 | 595.35 | M+H, M+Na | C33H46N4O6 | -0.85 | 84.56 | (-)-Stercobilin |
| 12.12 | 471.31 | M+FA-H | C28H42O3 | -2.15 | 92.72 | (3beta,5alpha,6alpha,7alpha,22E,24R)-5,6-Epoxyergosta-8,14,22-triene-3,7-diol |
| 12.40 | 1113.55 | M-H, M+FA-H, M+Cl | C54H84O21 | -1.50 | 92.91 | Soyasaponin bg |
| 12.72 | 391.28 | M+FA-H | C23H38O2 | -3.10 | 97.83 | 3-Hydroxy-1-phenyl-1-heptadecanone |
| 13.13 | 391.29 | M+H, M+Na, M+H-H2O | C24H38O4 | 2.07 | 98.69 | 12-Ketodeoxycholic acid |
| 13.29 | 471.24 | M-H | C24H40O7S | -1.69 | 98.70 | Chenodeoxycholic acid sulfate |
| 13.43 | 415.21 | M+NH4, M+Na, M+K, M+H, M+H-H2O | C24H30O6 | 0.99 | 98.81 | Armillarin |
| 13.67 | 529.28 | M-H | C30H42O8 | 4.33 | 93.18 | 7,12-Dihydroxy-3,11,15,23-tetraoxolanost-8-en-26-oic acid |
| 13.73 | 424.25 | M+FA-H | C18H38NO5P | -2.04 | 98.95 | Sphingosine 1-phosphate |
| 13.88 | 389.27 | M+FA-H | C23H36O2 | -2.51 | 95.44 | 1-Phenyl-1,3-heptadecanedione |
| 14.07 | 471.31 | M+FA-H | C28H42O3 | -4.14 | 89.04 | 13'-Hydroxy-gamma-tocotrienol |
| 14.14 | 457.33 | M+FA-H | C28H44O2 | -2.33 | 97.70 | 4a-Formyl-5a-cholesta-8,24-dien-3b-ol |
| 14.53 | 464.28 | M-H | C22H44NO7P | -1.46 | 90.69 | LysoPC(14:1(9Z)) |
| 14.57 | 440.28 | M+H, M+Na, M+H-H2O | C20H42NO7P | 2.53 | 98.18 | LysoPE(0:0/15:0) |
| 15.01 | 471.31 | M-H | C29H44O5 | 0.51 | 76.73 | (17alpha,23S)-Epoxy-28,29-dihydroxy-27-norlanost-8-ene-3,24-dione |
| 15.67 | 476.28 | M-H | C23H44NO7P | -1.21 | 96.91 | LysoPE(0:0/18:2(9Z,12Z)) |
| 15.88 | 504.31 | M-H | C25H48NO7P | -0.14 | 97.82 | LysoPE(0:0/20:2(11Z,14Z)) |
| 16.89 | 480.31 | M-H | C23H48NO7P | -1.59 | 97.08 | LysoPC(15:0) |
| 16.89 | 540.33 | M+FA-H | C24H50NO7P | -1.45 | 96.79 | LysoPC(16:0) |
| 17.60 | 436.28 | M-H | C21H44NO6P | -1.98 | 92.60 | PE(P-16:0e/0:0) |
| 17.84 | 506.33 | M-H | C25H50NO7P | 0.25 | 95.18 | LysoPE(0:0/20:1(11Z)) |
| 17.84 | 566.35 | M+FA-H | C26H52NO7P | -0.56 | 97.10 | LysoPC(18:1(9Z)) |
| 17.90 | 453.30 | M+FA-H | C28H40O2 | -1.51 | 93.17 | Ganodosterone |
| 18.31 | 441.33 | M+H-H2O, M+H | C29H46O4 | -4.45 | 93.23 | (3beta,17alpha,23S)-17,23-Epoxy-3,29-dihydroxy-27-norlanost-8-en-24-one |
| 18.44 | 457.33 | M+FA-H | C28H44O2 | -2.52 | 96.37 | Amasterol |
| 19.06 | 363.22 | M+Cl | C21H32N2O | -1.77 | 92.86 | Stanozolol |
| 19.33 | 421.30 | M+FA-H | C24H40O3 | -2.48 | 96.94 | Allolithocholic acid |
| 19.90 | 476.28 | M-H | C23H44NO7P | -0.50 | 96.54 | LysoPE(18:2(9Z,12Z)/0:0) |
| 19.90 | 480.31 | M-H | C23H48NO7P | -1.74 | 96.45 | LysoPE(0:0/18:0) |
| 2.01 | 243.12 | M-H2O-H | C12H22O6 | -4.74 | 96.15 | Phaseolic acid |
| 2.43 | 131.07 | M-H2O-H, M-H | C6H12O3 | -3.07 | 98.14 | 2-Hydroxy-3-methylpentanoic acid |
| 2.60 | 597.15 | M+FA-H | C25H28O14 | 0.61 | 98.09 | 3',5,6-Trihydroxy-3,4',7,8-tetramethoxyflavone 3-glucoside |
| 2.99 | 329.10 | M-H, M+Cl | C18H18O6 | -2.65 | 97.09 | 7-Hydroxy-3-(3-hydroxy-4-methoxybenzyl)-5-methoxy-4-chromanone |
| 20.01 | 524.37 | M+Na, M+K, M+H, M+H-H2O | C26H54NO7P | 2.37 | 98.07 | 2-acetyl-1-alkyl-sn-glycero-3-phosphocholine |
| 20.07 | 299.26 | M-H, M+Cl | C18H36O3 | -3.12 | 98.52 | (R)-3-Hydroxy-Octadecanoic acid |
| 20.07 | 621.51 | M+FA-H | C37H68O4 | -4.61 | 96.26 | Cohibin C |
| 20.20 | 508.34 | M-H | C25H52NO7P | -0.53 | 95.11 | LysoPC(17:0) |
| 20.20 | 568.36 | M+FA-H | C26H54NO7P | -0.97 | 96.72 | LysoPC(18:0) |
| 20.66 | 299.26 | M+H, M+K, M+Na, M+H-H2O | C18H34O3 | 4.94 | 99.67 | Ricinoleic acid |
| 20.76 | 594.38 | M+FA-H | C28H56NO7P | 2.13 | 40.92 | LysoPC(20:1(11Z)) |
| 20.77 | 297.24 | M+FA-H | C17H32O | -3.90 | 97.85 | 13-Heptadecyn-1-ol |
| 21.51 | 271.23 | M-H, M+FA-H | C15H30O | -1.72 | 99.18 | Pentadecanal |
| 21.98 | 443.35 | M+H-H2O, M+H | C29H46O3 | 2.45 | 97.27 | Camellenodiol |
| 22.23 | 854.59 | M+FA-H | C46H84NO8P | 3.14 | 95.42 | PC(18:0/20:4(5Z,8Z,11Z,14Z)) |
| 22.31 | 802.56 | M+FA-H | C42H80NO8P | 0.29 | 75.65 | PE(15:0/22:2(13Z,16Z)) |
| 22.49 | 313.28 | M+H, M+Na, M+H-H2O | C19H38O4 | 0.98 | 99.43 | MG(0:0/16:0/0:0) |
| 22.50 | 341.14 | M-H2O-H | C21H20N4O2 | 2.99 | 97.65 | Lepidine C |
| 22.57 | 599.32 | M-H | C27H53O12P | 0.70 | 96.60 | 1-Stearoylglycerophosphoinositol |
| 22.73 | 830.59 | M-H2O-H, M-H | C48H82NO8P | -2.23 | 93.42 | PC(18:2(9Z,12Z)/22:5(7Z,10Z,13Z,16Z,19Z)) |
| 22.98 | 461.36 | M-H, M+Cl | C29H50O4 | -1.45 | 91.38 | 6-Deoxohomodolichosterone |
| 24.27 | 493.29 | M-H2O-H | C31H44O6 | -4.74 | 90.18 | Glyuranolide |
| 3.49 | 204.07 | M-H2O-H, M-H | C11H11NO3 | -3.88 | 97.29 | Indolelactic acid |
| 4.08 | 315.12 | M-H | C18H20O5 | -2.86 | 96.31 | Verimol B |
| 4.38 | 333.01 | M-H2O-H | C15H12O8S | -3.35 | 96.53 | (5,7-dihydroxy-4-oxo-2-phenyl-3,4-dihydro-2H-1-benzopyran-3-yl)oxidanesulfonic acid |
| 4.38 | 333.24 | M+FA-H | C20H32O | 0.21 | 88.25 | All-trans-13,14-dihydroretinol |
| 4.40 | 253.05 | M-H2O-H | C15H12O5 | -4.34 | 95.93 | Naringenin |
| 4.50 | 329.10 | M-H2O-H, M-H | C18H18O6 | 2.50 | 95.75 | Aflatoxin B1 dialcohol |
| 4.62 | 363.02 | M-H | C10H13N4O7PS | -0.16 | 97.91 | 6-Thioinosine-5'-monophosphate |
| 4.65 | 285.11 | M-H2O-H, M-H | C17H18O4 | 1.46 | 96.12 | 4'-Hydroxy-5,7-dimethoxyflavan |
| 4.80 | 1267.60 | M-H | C59H96O29 | -0.24 | 87.26 | Soyasaponin A1 |
| 4.85 | 383.13 | M+Cl | C19H24O6 | 1.62 | 94.37 | Gibberellin A60 |
| 5.43 | 575.27 | M+FA-H | C26H42O11 | 3.20 | 90.79 | Cinncassiol D2 glucoside |
| 5.61 | 1309.61 | M+FA-H | C60H96O28 | 0.07 | 91.77 | Lablaboside C |
| 5.62 | 1105.54 | M-H, M+Cl, M+FA-H | C53H86O24 | -0.87 | 93.11 | Soyasaponin A2 |
| 5.89 | 321.04 | M+FA-H | C14H12O4S | -3.65 | 97.74 | Suprofen S-oxide |
| 5.89 | 591.32 | M-H | C33H44N4O6 | -1.77 | 94.76 | Mesobilirubinogen |
| 6.12 | 269.04 | M-H | C15H10O5 | -4.39 | 95.86 | Apigenin |
| 6.12 | 349.00 | M-H | C15H10O8S | -3.60 | 97.77 | Apigenin 7-sulfate |
| 6.24 | 943.49 | M-H, M+FA-H, M+Cl | C47H76O19 | -0.34 | 93.04 | Kudzusaponin SA2 |
| 7.20 | 469.28 | M-H, M+FA-H, M+Cl | C24H40O6 | -2.60 | 97.37 | 1b-Hydroxycholic acid |
| 7.20 | 503.23 | M+FA-H | C23H38O7S | -1.16 | 91.47 | 3-Sulfodeoxycholic acid |
| 7.24 | 489.32 | M+FA-H | C28H44O4 | -3.25 | 95.26 | MG(0:0/24:6(6Z,9Z,12Z,15Z,18Z,21Z)/0:0) |
| 7.24 | 514.28 | M-H | C26H45NO7S | -3.02 | 97.34 | Taurocholic acid |
| 7.35 | 297.12 | M-H | C16H18N4S | -3.37 | 87.36 | 4'-N-desmethylolanzapine |
| 7.35 | 496.27 | M-H2O-H | C26H45NO7S | -1.84 | 87.99 | Tauro-b-muricholic acid |
| 7.64 | 512.27 | M-H | C26H43NO7S | -1.57 | 88.58 | Sulfolithocholylglycine |
| 8.28 | 1001.50 | M-H, M+Cl, M+FA-H | C48H76O19 | 0.09 | 90.77 | 28-Glucuronyloleanolic acid 3-[galactosyl-(1->3)-glucoside] |
| 8.36 | 421.26 | M+FA-H | C23H36O4 | -0.20 | 96.28 | MG(0:0/20:5(5Z,8Z,11Z,14Z,17Z)/0:0) |
| 8.37 | 487.24 | M+Cl | C27H36N2O4 | -0.72 | 96.77 | Repaglinide |
| 8.65 | 517.32 | M-H | C30H46O7 | -2.12 | 77.68 | Ganolucidic acid C |
| 8.90 | 485.22 | M-H | C27H34O8 | 2.02 | 90.94 | Austalide I |
| 8.91 | 489.32 | M+FA-H | C28H44O4 | -4.84 | 95.98 | 1-a,24R,25-Trihydroxyvitamin D2 |
| 9.13 | 485.29 | M+FA-H | C28H40O4 | -4.82 | 95.15 | 13'-Carboxy-gamma-tocotrienol |
| 9.14 | 553.34 | M+Cl, M+FA-H, M-H | C30H50O9 | -1.37 | 97.84 | Notoginsenoside R10 |
| 9.34 | 457.29 | M-H, M+FA-H | C28H42O5 | -2.48 | 88.71 | Pubesenolide |
| 9.37 | 403.25 | M-H, M+FA-H | C24H36O5 | 4.47 | 94.74 | Lovastatin |
| 9.38 | 355.26 | M+H-H2O, M+H | C24H36O3 | 1.69 | 97.71 | Cervonoyl ethanolamide |
| 9.44 | 453.28 | M-H, M+Cl, M+FA-H | C24H40O5 | -3.06 | 99.16 | 3a,7a,12b-Trihydroxy-5b-cholanoic acid |
| 9.44 | 837.55 | M-H | C43H83O13P | -0.77 | 98.29 | PI(16:0/18:0) |
| 9.53 | 487.30 | M+FA-H | C28H42O4 | -4.51 | 98.76 | (3beta,5alpha,9alpha,22E,24R)-5,9-Epidioxy-3-hydroxyergosta-7,22-dien-6-one |
| 9.54 | 371.26 | M+H-H2O, M+H | C24H34O3 | 0.42 | 94.88 | Antibiotic SB 202742 |
| 9.58 | 893.51 | M-H | C54H70MgN4O6 | 2.94 | 78.01 | Chlorophyll d |
| 9.61 | 485.45 | M+Cl | C31H62O | -4.55 | 85.52 | 9-Hentriacontanone |
| 9.61 | 485.51 | M-H2O-H | C35H68O | -4.53 | 88.57 | 1,7-Pentatriacontadien-11-ol |

**Table S2. Identification results of the main altered metabolites in livers**

| **Retention time (min)** | **m/z** | **Adducts** | **Formula** | **Mass Error (ppm)** | **Isotope Similarity** | **Compound** |
| --- | --- | --- | --- | --- | --- | --- |
| 0.74 | 184.08 | M+NH4 | C5H10O6 | 3.83 | 99.35 | Arabinonic acid |
| 12.02 | 498.29 | M-H | C26H45NO6S | -0.52 | 98.61 | Tauroursodeoxycholic acid |
| 14.52 | 542.32 | M+H | C28H48NO7P | -1.51 | 97.36 | LysoPC(20:5(5Z,8Z,11Z,14Z,17Z)) |
| 23.07 | 756.55 | M+H | C42H78NO8P | -4.31 | 92.09 | PC(16:1(9Z)/18:2(9Z,12Z)) |
| 23.39 | 355.27 | M+FA-H | C23H34 | 2.75 | 97.34 | 20-Dihydrodydrogesterone |
| 6.83 | 514.28 | M-H | C26H45NO7S | -0.24 | 98.83 | Taurocholic acid |
| 7.94 | 464.30 | M+FA-H | C25H41NO4 | 1.08 | 94.00 | Stearidonyl carnitine |
| 8.58 | 297.12 | M+FA-H | C11H16N4O3 | -1.93 | 94.94 | Histidinyl-Proline |

**Table S3. Identification results of the main altered metabolites in serum**

| **Retention time (min)** | **m/z** | **Adducts** | **Formula** | **Mass Error (ppm)** | **Isotope Similarity** | **Compound** |
| --- | --- | --- | --- | --- | --- | --- |
| 1.22 | 771.65 | M+H | C49H86O6 | 0.56 | 64.87 | TG(14:0/14:0/18:4(6Z,9Z,12Z,15Z)) |
| 1.23 | 809.61 | M-H | C47H87O8P | 3.78 | 62.57 | PA(20:3(5Z,8Z,11Z)/24:0) |
| 11.17 | 371.20 | 2M-H | C13H14O | 4.14 | 94.90 | (E)-2-Tridecene-4,6,8-triyn-1-ol |
| 11.79 | 370.30 | M+NH4 | C21H36O4 | 0.23 | 98.71 | MG(0:0/18:3(9Z,12Z,15Z)/0:0) |
| 12.96 | 385.22 | M-H | C20H34O7 | -4.32 | 89.93 | 10,11-dihydro-20-trihydroxy-leukotriene B4 |
| 15.73 | 1043.68 | 2M-H | C26H50O10 | 3.41 | 94.24 | Polysorbate 20 |
| 16.15 | 1059.64 | 2M-H | C31H46O7 | 2.97 | 96.02 | 3-keto Fusidic acid |
| 16.15 | 410.23 | M+H, M+Na, M+H-H2O | C25H31NO4 | -1.01 | 96.43 | Acidissiminol epoxide |
| 16.18 | 685.24 | 2M-H | C15H21NO8 | -3.90 | 95.77 | N-(1-Deoxy-1-fructosyl)tyrosine |
| 16.71 | 831.50 | M+Na | C41H77O13P | 4.72 | 84.98 | PI(16:0/16:1(9Z)) |
| 16.97 | 295.23 | M-H2O-H | C18H34O4 | -0.80 | 88.36 | Octadecanedioic acid |
| 16.98 | 279.23 | M+H-H2O, M+H | C18H30O2 | -4.56 | 97.50 | Alpha-Linolenic acid |
| 17.99 | 297.24 | M-H2O-H | C18H36O4 | -4.91 | 88.59 | MG(0:0/15:0/0:0) |
| 19.04 | 321.24 | M-H | C20H34O3 | -3.67 | 87.08 | 15(S)-Hydroxyeicosatrienoic acid |
| 2.01 | 172.99 | M-H | C6H6O4S | -1.28 | 92.66 | Phenol sulphate |
| 21.92 | 299.29 | M+H-H2O | C19H40O3 | 0.81 | 96.02 | 1,2,4-Nonadecanetriol |
| 22.72 | 371.26 | M+H-H2O, M+H | C24H34O3 | 0.16 | 91.94 | 3-Oxo-4,6-choladienoic acid |
| 22.72 | 389.27 | M+H-H2O | C24H38O5 | -1.15 | 87.74 | 7-Ketodeoxycholic acid |
| 22.72 | 732.55 | M+H | C40H78NO8P | -4.93 | 90.01 | PC(14:0/18:1(11Z)) |
| 22.72 | 806.57 | M+Na, M+H-H2O | C44H82NO8P | 1.84 | 88.13 | PC(14:1(9Z)/22:2(13Z,16Z)) |
| 22.75 | 828.55 | M+Na | C46H80NO8P | -1.19 | 75.19 | PC(16:0/22:6(4Z,7Z,10Z,13Z,16Z,19Z)) |
| 23.19 | 329.25 | M-H | C22H34O2 | 1.79 | 89.61 | Docosapentaenoic acid (22n-6) |
| 23.38 | 357.28 | M+H-H2O | C24H38O3 | 2.43 | 98.24 | 2-(10-Heptadecenyl)-6-hydroxybenzoic acid |
| 23.39 | 355.27 | 2M-H | C12H18O | 2.82 | 96.08 | Propofol |
| 23.73 | 828.55 | M+Na | C46H80NO8P | -3.99 | 71.88 | PC(16:0/22:6(4Z,7Z,10Z,13Z,16Z,19Z)) |
| 23.83 | 305.25 | M-H | C20H34O2 | -4.76 | 88.38 | 8,11,14-Eicosatrienoic acid |

**Table S4. Identification results of the main altered metabolites in urine**

| **Retention time (min)** | **m/z** | **Adducts** | **Formula** | **Mass Error (ppm)** | **Isotope Similarity** | **Compound** |
| --- | --- | --- | --- | --- | --- | --- |
| 0.62 | 319.16 | M+H-H2O, M+H | C12H24N4O7 | 2.85 | 86.00 | N2-Fructopyranosylarginine |
| 0.65 | 347.12 | M+H, M+Na, M+K, M+H-2H2O | C17H18N2O6 | -2.70 | 88.61 | Nifedipine |
| 0.79 | 115.00 | M-H2O-H | C4H6O5 | -4.98 | 97.37 | L-Malic acid |
| 1.05 | 340.10 | M-H2O-H, M+Cl | C15H21NO9 | -2.21 | 83.71 | Epinephrine glucuronide |
| 1.08 | 228.00 | M-H2O-H | C8H9NO6S | 0.02 | 83.96 | 2-Hydroxyacetaminophen sulfate |
| 1.11 | 364.05 | M+ACN+H | C11H12Cl2N2O5 | 1.58 | 61.68 | Chloramphenicol |
| 1.12 | 240.00 | M-H | C9H7NO5S | -1.65 | 88.19 | Indole-3-carboxilic acid-O-sulphate |
| 1.13 | 335.13 | M-H2O-H | C14H26O10 | -2.03 | 94.47 | Isopropyl apiosylglucoside |
| 1.14 | 375.11 | M+H-H2O, M+H, M+H-2H2O | C19H20O9 | -1.81 | 83.42 | 3,4,5-trihydroxy-6-{[(3E)-4-(1-oxo-1H-isochromen-3-yl)but-3-en-2-yl]oxy}oxane-2-carboxylic acid |
| 1.15 | 319.14 | M+H | C15H18N4O4 | -1.98 | 82.81 | Asparaginyl-Tryptophan |
| 1.17 | 242.01 | M-H2O-H | C9H11NO6S | -2.17 | 93.67 | 2-Methoxyacetaminophen sulfate |
| 1.17 | 365.14 | M-H2O-H | C19H28O6S | 3.12 | 82.93 | 3b,16a-Dihydroxyandrostenone sulfate |
| 1.17 | 597.15 | M+FA-H | C25H28O14 | 4.00 | 31.47 | 3',5,6-Trihydroxy-3,4',7,8-tetramethoxyflavone 3-glucoside |
| 1.20 | 228.09 | M+FA-H | C9H13NO3 | -4.74 | 98.53 | Epinephrine |
| 1.20 | 244.03 | M-H2O-H | C9H13NO6S | -3.56 | 96.10 | Epinephrine sulfate |
| 1.20 | 260.15 | M+FA-H | C11H21NO3 | 0.64 | 87.67 | N-Nonanoylglycine |
| 1.21 | 244.16 | M+H-2H2O | C13H21N5O2 | -1.42 | 68.11 | Etamiphylline |
| 1.22 | 274.09 | M-H2O-H, M+Cl | C11H19NO8 | -1.23 | 93.29 | Galactosyl 4-hydroxyproline |
| 1.23 | 276.13 | M+H-2H2O | C20H22ClN | -0.84 | 73.47 | Pyrrobutamine |
| 1.23 | 336.07 | M-H | C15H15NO8 | -1.65 | 95.83 | 2,8-Dihydroxyquinoline-beta-D-glucuronide |
| 1.23 | 434.05 | M-H | C13H17N5O8S2 | 4.33 | 93.36 | Aztreonam |
| 1.38 | 329.03 | M-H | C10H19O6PS2 | 4.30 | 96.19 | Malathion |
| 1.40 | 189.11 | M+FA-H | C8H16O2 | -3.41 | 95.86 | Caprylic acid |
| 1.40 | 202.02 | M-H | C7H9NO4S | -4.59 | 97.31 | Cystathionine ketimine |
| 1.42 | 305.03 | M-H, M+FA-H | C11H14O8S | -1.51 | 95.08 | 4-Hydroxy-5-(dihydroxyphenyl)-valeric acid-O-sulphate |
| 1.42 | 387.17 | M-H | C18H28O9 | -1.66 | 94.25 | beta-D-Glucopyranosyl-11-hydroxyjasmonic acid |
| 1.43 | 278.11 | M+Cl | C14H17N3O | -1.41 | 59.23 | Frovatriptan |
| 1.43 | 402.13 | M+FA-H | C21H21ClFNO | -1.00 | 17.88 | Haloperidol 1,2,3,6-tetrahydropyridine |
| 1.47 | 433.11 | M-H | C21H22O10 | 0.29 | 93.06 | 4'-Hydroxyfenoprofen glucuronide |
| 1.51 | 269.07 | M-H | C12H14O7 | -2.05 | 99.23 | Phenylglucuronide |
| 1.51 | 269.24 | M-H2O-H | C14H32N4O2+2 | 3.28 | 86.12 | N(1),N(12)-diacetylsperminium(2+) |
| 1.51 | 292.09 | M-H2O-H | C11H21NO7S | -1.05 | 91.50 | N-(1-Deoxy-1-fructosyl)methionine |
| 1.51 | 539.14 | M+FA-H | C23H26O12 | -1.50 | 67.87 | 4'-O-methyl-(-)-epicatechin-3'-O-beta-glucuronide |
| 1.52 | 771.36 | M+K, M+ACN+H, M+Na | C43H47N5O6 | 4.92 | 87.79 | Jubanine B |
| 1.53 | 228.00 | M+FA-H | C7H5NO3S | -2.36 | 97.30 | Saccharin |
| 1.53 | 431.19 | M+Cl, M+FA-H | C19H30O8 | 1.80 | 92.62 | Corchoionol C 9-glucoside |
| 1.53 | 639.20 | M-H | C35H32N2O10 | -0.88 | 80.45 | Citbismine A |
| 1.54 | 809.69 | M+FA-H | C48H92O6 | 2.02 | 61.27 | TG(14:0/15:0/16:0) |
| 1.55 | 849.36 | M+K, M+Na | C41H62O16 | -2.44 | 84.95 | Betavulgaroside VII |
| 1.64 | 273.22 | M-H2O-H | C19H32O2 | -0.55 | 89.71 | 3b,17b-Dihydroxyetiocholane |
| 1.65 | 294.10 | M+Cl | C14H17N3O2 | -1.00 | 97.06 | norzolmitripan |
| 1.65 | 319.14 | M-H | C14H24O8 | -1.74 | 93.67 | Valproic acid glucuronide |
| 1.65 | 617.17 | M-H2O-H, M+Cl | C30H30O12 | -0.60 | 84.59 | 3,4,5-trihydroxy-6-{[8-(hydroxymethyl)-8-methyl-6-(2-methylpropanoyl)-2-oxo-4-phenyl-2H,8H-pyrano[2,3-f]chromen-5-yl]oxy}oxane-2-carboxylic acid |
| 1.65 | 617.49 | M+Cl | C36H70O5 | -2.46 | 70.93 | DG(15:0/18:0/0:0) |
| 1.69 | 321.15 | M-H | C14H26O8 | -3.44 | 95.69 | Butyl (S)-3-hydroxybutyrate glucoside |
| 1.70 | 160.04 | M-H2O-H | C9H9NO3 | -4.66 | 96.70 | Hippuric acid |
| 1.70 | 713.28 | M+FA-H | C36H44O12 | 1.43 | 96.38 | 6-{4-[3-(3,7-dimethylocta-2,6-dien-1-yl)-5,7-dihydroxy-6-(3-methylbut-2-en-1-yl)-4-oxo-3,4-dihydro-2H-1-benzopyran-2-yl]-3-hydroxyphenoxy}-3,4,5-trihydroxyoxane-2-carboxylic acid |
| 1.70 | 713.63 | M-H2O-H | C50H84O3 | 2.39 | 66.22 | CE(MonoMe(13,5)) |
| 1.72 | 348.09 | M-H | C12H19N3O7S | -0.71 | 95.91 | S-(Formylmethyl)glutathione |
| 1.72 | 495.12 | M-H | C20H24N4O9S | 0.09 | 97.16 | 1-Nitro-5-glutathionyl-6-hydroxy-5,6-dihydronaphthalene |
| 1.72 | 525.04 | M-H2O-H | C21H20O15S | 2.97 | 89.08 | 8-Hydroxyluteolin 8-glucoside 3'-sulfate |
| 1.72 | 593.09 | M-H, M+FA-H | C25H24O14 | -0.86 | 91.95 | Myricetin 3-(3'',4''-diacetylrhamnoside) |
| 1.72 | 237.12 | M+H-H2O, M+H | C12H16N2O3 | 1.82 | 89.73 | Hexobarbital |
| 1.72 | 279.13 | M+H-H2O, M+H | C14H18N2O4 | 2.71 | 94.97 | N1-(alpha-D-ribosyl)-5,6-dimethyl-benzimidazole |
| 1.72 | 497.13 | M+Na, M+K, 2M+H, M+H | C20H24N4O9S | 3.29 | 93.24 | 1-Nitro-5-hydroxy-6-glutathionyl-5,6-dihydronaphthalene |
| 1.72 | 631.34 | 2M+H | C16H21N5O2 | -4.11 | 95.60 | Alizapride |
| 1.74 | 594.19 | M+FA-H | C26H31NO12 | 4.49 | 91.21 | 6-{[1-(2-{[2-(3,4-dimethoxyphenyl)ethyl]-C-hydroxycarbonimidoyl}eth-1-en-1-yl)-3-methoxy-4-oxocyclohexa-2,5-dien-1-yl]oxy}-3,4,5-trihydroxyoxane-2-carboxylic acid |
| 1.76 | 429.08 | M-H | C21H18O10 | -2.76 | 98.09 | Daidzein 4'-O-glucuronide |
| 1.83 | 705.11 | M+FA-H | C26H28O20 | -4.04 | 90.10 | 6-[5-({[3,5-dihydroxy-2-(hydroxymethyl)-6-(3,4,5-trihydroxybenzoyloxy)oxan-4-yl]oxy}carbonyl)-2,3-dihydroxyphenoxy]-3,4,5-trihydroxyoxane-2-carboxylic acid |
| 1.84 | 285.08 | M+H, M+K | C15H18O3 | -0.58 | 99.05 | 2-Oxo-5,11(13)-eudesmadien-12,8-olide |
| 1.84 | 461.11 | M+H, 2M+H | C22H20O11 | 1.45 | 94.67 | Glycitein 7-O-glucuronide |
| 1.86 | 79.05 | M+H-2H2O | C6H10O2 | 4.70 | 96.28 | Delta-Hexanolactone |
| 1.94 | 590.19 | M+FA-H | C20H35NO16 | -4.65 | 67.98 | Lacto-N-triose I |
| 2.02 | 162.06 | M+H-2H2O | C9H11NO4 | 3.91 | 98.40 | L-Dopa |
| 2.02 | 483.10 | M+FA-H | C20H22O9S | 4.12 | 95.89 | {4,8-dihydroxy-17-methoxy-10-oxo-2-oxatricyclo[13.2.2.1鲁,鈦穄icosa-1(17),3,5,7(20),15,18-hexaen-14-yl}oxidanesulfonic acid |
| 2.06 | 159.04 | M+H-H2O, M+H | C10H8O3 | 3.15 | 95.35 | Herniarin |
| 2.06 | 240.16 | M+H | C13H21NO3 | 3.82 | 97.45 | Salbutamol |
| 2.15 | 263.02 | M+FA-H | C8H10O5S | -0.83 | 94.02 | (5-ethyl-2-hydroxyphenyl)oxidanesulfonic acid |
| 2.18 | 225.11 | M+FA-H | C11H16O2 | -4.49 | 94.96 | 2,2,7,7-Tetramethyl-1,6-dioxaspiro[4.4]nona-3,8-diene |
| 2.19 | 629.53 | M+Cl | C38H74O4 | -2.24 | 69.13 | Ethylene glycol distearate |
| 2.27 | 337.04 | M+FA-H | C14H12O5S | -0.21 | 95.97 | (2-oxo-1,2-diphenylethoxy)sulfonic acid |
| 2.27 | 316.21 | M+ACN+H | C14H26O5 | 2.71 | 95.47 | 3-Hydroxytetradecanedioic acid |
| 2.28 | 287.02 | M-H2O-H, M-H | C11H12O7S | 1.59 | 96.79 | 5'-(3',4'-Dihydroxyphenyl)-gamma-valerolactone sulfate |
| 2.30 | 295.13 | M+FA-H | C13H18N2O3 | -2.14 | 97.78 | Heptabarbital |
| 2.33 | 300.13 | M+ACN+H | C9H14N4O5 | -2.61 | 42.16 | AICA-riboside |
| 2.41 | 196.01 | M+FA-H | C7H5NOS | -3.26 | 94.95 | 1,2-Benzisothiazol-3(2H)-one |
| 2.41 | 230.14 | M+H-H2O | C11H21NO5 | 4.70 | 93.33 | (R)-3-hydroxybutyrylcarnitine |
| 2.43 | 215.09 | M-H, M+FA-H | C9H14O3 | 3.81 | 97.87 | 1,4-Ipomeadiol |
| 2.49 | 347.13 | M+FA-H | C14H22O7 | -0.22 | 93.26 | Garcinia lactone dibutyl ester |
| 2.50 | 311.07 | M+H, M+Na | C16H11ClN4O | 3.01 | 73.63 | 4-Hydroxy-estazolam |
| 2.55 | 399.17 | M-H2O-H | C19H30O10 | 0.41 | 95.23 | 2-[4-(3-Hydroxypropyl)-2-methoxyphenoxy]-1,3-propanediol 1-glucoside |
| 2.56 | 433.11 | M+K, 2M+H, M+H | C21H20O10 | 3.32 | 96.42 | Dihydrodaidzein 7-O-glucuronide |
| 2.56 | 173.08 | M-H | C8H14O4 | -2.71 | 97.52 | Suberic acid |
| 2.58 | 431.10 | M-H2O-H | C21H22O11 | -0.85 | 98.54 | Phloretin 2'-O-glucuronide |
| 2.59 | 259.03 | M-H | C10H12O6S | 0.14 | 91.32 | [2-hydroxy-6-methoxy-4-(prop-2-en-1-yl)phenyl]oxidanesulfonic acid |
| 2.72 | 226.14 | M+H-H2O, M+H | C12H19NO3 | 4.91 | 97.42 | Terbutaline |
| 2.73 | 242.14 | M-H | C12H21NO4 | -3.44 | 97.77 | Tiglylcarnitine |
| 2.88 | 361.15 | M-H2O-H | C16H28O10 | -1.63 | 90.99 | 3-Methyl-3-butenyl apiosyl-(1->6)-glucoside |
| 2.90 | 289.17 | M+FA-H | C13H24O4 | -0.29 | 96.32 | 1,11-Undecanedicarboxylic acid |
| 2.90 | 397.10 | M-H | C14H22O13 | 4.31 | 84.60 | 6-({2-[(acetyloxy)methyl]-4,5,6-trihydroxyoxan-3-yl}oxy)-3,4,5-trihydroxyoxane-2-carboxylic acid |
| 2.92 | 242.14 | M+H-H2O, 2M+H, M+ACN+H | C11H12N4 | 3.54 | 98.73 | Hydralazine acetone hydrazone |
| 2.94 | 349.15 | M-H2O-H | C15H28O10 | -1.44 | 97.59 | (2S)-2-Butanol O-[b-D-Apiofuranosyl-(1->6)-b-D-glucopyranoside] |
| 2.95 | 228.12 | M+FA-H | C10H17NO2 | -3.61 | 97.25 | Methyprylon |
| 3.11 | 347.17 | M-H | C16H28O8 | -0.69 | 87.62 | Foeniculoside VIII |
| 3.14 | 359.17 | M+FA-H | C16H26O6 | -1.56 | 93.75 | (-)-trans-Carveol glucoside |
| 3.14 | 489.14 | M-H | C24H26O11 | 3.29 | 80.76 | 4',5,6-Trimethylscutellarein 7-glucoside |
| 3.14 | 543.05 | M+Cl | C18H24N2O11S2 | 0.10 | 67.95 | 1,4-Dimethoxyglucobrassicin |
| 3.15 | 445.08 | M-H2O-H | C21H20O12 | -1.01 | 93.55 | 3,4,5-trihydroxy-6-[2,4,6-trihydroxy-3-(2-oxo-3-phenylpropanoyl)phenoxy]oxane-2-carboxylic acid |
| 3.15 | 445.30 | M+FA-H | C26H40O3 | -1.21 | 77.41 | Testosterone enanthate |
| 3.16 | 400.13 | M+H-H2O, M+Na | C18H23N3O6 | 3.19 | 76.55 | Imidaprilat |
| 3.17 | 361.15 | M+FA-H | C15H24O7 | -0.36 | 96.98 | 10-Hydroxy-8-nor-2-fenchanone glucoside |
| 3.24 | 190.12 | M+ACN+H | C10H12O | 4.32 | 99.07 | Cuminaldehyde |
| 3.40 | 379.21 | M-H, M+FA-H | C21H32O6 | -0.60 | 94.51 | [6]-Gingerdiol 3,5-diacetate |
| 3.46 | 206.08 | M+H-2H2O, M+H, M+H-H2O | C11H11NO3 | 4.95 | 95.56 | 5-Methoxyindoleacetate |
| 3.47 | 204.07 | M-H2O-H, M-H | C11H11NO3 | -0.73 | 95.91 | Indolelactic acid |
| 3.48 | 160.08 | M+H-2H2O | C10H13NO3 | 4.31 | 98.89 | Metyrosine |
| 3.51 | 265.12 | M-H | C13H18N2O4 | -1.97 | 98.17 | Phenylalanyl-Threonine |
| 3.56 | 405.21 | M-H | C19H34O9 | -1.42 | 90.71 | Kiwiionoside |
| 3.57 | 247.15 | M+FA-H | C11H22O3 | -2.15 | 95.31 | 3-Hydroxynonyl acetate |
| 3.59 | 363.17 | M-H2O-H | C16H30O10 | 0.31 | 66.19 | 1,2,10-Trihydroxydihydro-trans-linalyl oxide 7-O-beta-D-glucopyranoside |
| 3.60 | 201.11 | M+FA-H | C9H16O2 | -2.89 | 96.80 | 4-Hydroxynonenal |
| 3.64 | 341.22 | M+H-H2O, M+H | C21H28N2O2 | 3.17 | 58.93 | 14,19-Dihydroaspidospermatine |
| 3.68 | 208.10 | M+H, M+Na, M+H-H2O | C11H13NO3 | 4.89 | 96.51 | Phenylpropionylglycine |
| 3.70 | 206.08 | M-H | C11H13NO3 | -4.92 | 96.62 | N-Acetyl-L-phenylalanine |
| 3.74 | 497.08 | M-H2O-H | C21H24O13S | 2.67 | 96.13 | ({3,4,5-trihydroxy-6-[3,5,7-trihydroxy-2-(3-hydroxyphenyl)-3,4-dihydro-2H-1-benzopyran-6-yl]oxan-2-yl}methoxy)sulfonic acid |
| 3.74 | 539.12 | M+FA-H | C19H26O15 | -4.21 | 93.99 | 2-O-Galloylsucrose |
| 3.75 | 533.17 | M-H2O-H | C26H32O13 | 1.93 | 84.38 | (Z)-Resveratrol 3,4'-diglucoside |
| 3.81 | 413.15 | M+FA-H | C18H24O8 | 1.10 | 96.37 | 4-Hydroxy-3-prenylbenzoic acid glucoside |
| 3.83 | 211.17 | M+H-H2O, M+H | C13H22O2 | 3.84 | 91.99 | Linalyl propionate |
| 3.84 | 435.22 | M-H2O-H | C20H38O11 | 2.19 | 98.81 | Ethyl cellulose |
| 3.88 | 200.13 | M+H-H2O, M+H, M+Na | C10H19NO4 | 4.23 | 98.84 | Propionylcarnitine |
| 3.89 | 401.16 | M+H-H2O, M+H | C22H24O7 | -3.97 | 89.58 | Italipyrone |
| 3.90 | 435.18 | M-H2O-H | C26H30O7 | 1.36 | 96.03 | Obacunone |
| 3.90 | 593.19 | M+FA-H | C27H32O12 | -0.05 | 96.53 | 6-{4-[3-(4,5-dihydroxy-7-methoxy-2,2-dimethyl-3,4-dihydro-2H-1-benzopyran-6-yl)-3-oxopropyl]phenoxy}-3,4,5-trihydroxyoxane-2-carboxylic acid |
| 3.93 | 553.10 | M+FA-H | C19H24O16 | -4.38 | 95.46 | 6-[2,3-dihydroxy-5-({[3,4,5-trihydroxy-6-(hydroxymethyl)oxan-2-yl]oxy}carbonyl)phenoxy]-3,4,5-trihydroxyoxane-2-carboxylic acid |
| 3.97 | 243.08 | M-H2O-H | C13H14N2O4 | -1.41 | 95.86 | L-cis-Cyclo(aspartylphenylalanyl) |
| 3.98 | 245.09 | M+H-2H2O | C14H12N6O | -2.45 | 88.81 | Levosimendan |
| 4.01 | 186.11 | M+H-H2O | C9H17NO4 | 3.89 | 96.55 | L-Acetylcarnitine |
| 4.06 | 245.09 | M-H, M+FA-H | C13H14N2O3 | -3.32 | 99.54 | N-acetyltryptophan |
| 4.06 | 491.19 | M-H2O-H | C25H34O11 | 4.63 | 92.43 | Gibberellin A1 glucosyl ester |
| 4.06 | 172.08 | M+H-H2O | C11H11NO2 | 4.95 | 96.66 | Phensuximide |
| 4.06 | 247.31 | M+H-2H2O | C20H42 | -4.30 | 80.99 | Eicosane |
| 4.08 | 245.14 | M-H, M+Cl | C12H22O5 | -3.73 | 95.11 | 3-Hydroxydodecanedioic acid |
| 4.17 | 669.14 | 2M+H | C9H19O11P | 0.30 | 76.47 | 1-(sn-Glycero-3-phospho)-1D-myo-inositol |
| 4.19 | 163.11 | M+H-H2O, M+H | C11H14O | 2.24 | 94.83 | 1-Phenyl-1-pentanone |
| 4.19 | 409.22 | M+FA-H | C21H32O5 | -1.42 | 95.36 | Tetrahydrocortisone |
| 4.19 | 459.21 | M+Cl | C23H36O7 | -2.97 | 95.78 | Pravastatin |
| 4.20 | 273.08 | M+H-H2O | C15H14O6 | 1.89 | 95.66 | Epicatechin |
| 4.20 | 447.09 | M-H2O-H | C21H22O12 | -0.57 | 94.85 | 6-{2-[2-(2,4-dihydroxyphenyl)propanoyl]-3,5-dihydroxyphenoxy}-3,4,5-trihydroxyoxane-2-carboxylic acid |
| 4.23 | 146.06 | M+H-2H2O | C9H11NO3 | 3.47 | 97.49 | L-Tyrosine |
| 4.23 | 393.07 | M+Cl | C11H23N2O7PS | -0.88 | 92.00 | Pantetheine 4'-phosphate |
| 4.26 | 622.19 | M+Cl, M+FA-H | C23H43NO12P2 | -3.67 | 94.99 | N-Acetyl-D-glucosaminyldiphosphodolichol |
| 4.28 | 485.17 | M-H2O-H | C22H32O13 | -0.52 | 97.36 | (S)-Multifidol 2-[apiosyl-(1->6)-glucoside] |
| 4.31 | 203.13 | M-H | C10H20O4 | -4.42 | 94.34 | (2xi,6xi)-7-Methyl-3-methylene-1,2,6,7-octanetetrol |
| 4.31 | 250.14 | M+ACN+H | C12H16O3 | 3.88 | 96.07 | Isoelemicin |
| 4.35 | 253.05 | M-H, M+FA-H | C15H10O4 | -3.37 | 97.06 | Daidzein |
| 4.35 | 333.24 | M-H | C21H34O3 | 2.22 | 87.65 | Tetrahydrodeoxycorticosterone |
| 4.36 | 335.02 | M+H-2H2O | C15H14O9S | 1.12 | 89.80 | (-)-Epicatechin sulfate |
| 4.36 | 333.01 | M-H2O-H | C15H12O8S | -1.95 | 95.11 | (5,7-dihydroxy-4-oxo-2-phenyl-3,4-dihydro-2H-1-benzopyran-3-yl)oxidanesulfonic acid |
| 4.43 | 187.10 | M-H2O-H, M-H | C9H16O4 | -1.57 | 98.21 | Azelaic acid |
| 4.45 | 389.15 | M-H | C17H26O10 | 0.96 | 89.92 | Todatriol glucoside |
| 4.47 | 395.17 | 2M+H | C8H11N3O3 | -2.45 | 18.88 | N-Acetylhistidine |
| 4.48 | 237.12 | M+FA-H | C11H16N2O | -4.26 | 97.60 | Tocainide |
| 4.52 | 503.27 | 2M+H | C17H17NO | 2.02 | 98.70 | Didesmethyl doxepin |
| 4.55 | 345.12 | M+FA-H | C14H20O7 | -0.72 | 95.39 | 2-(3-Hydroxyphenyl)ethanol 1'-glucoside |
| 4.56 | 170.12 | M+H-2H2O | C10H15N5 | -2.31 | 74.58 | Phenformin |
| 4.58 | 215.11 | M-H | C8H16N4O3 | -4.63 | 99.15 | N-a-Acetyl-L-arginine |
| 4.58 | 214.11 | M-H2O-H, M-H | C10H17NO4 | 0.64 | 89.53 | 1-hydroxyoct-2-enoylglycine |
| 4.60 | 273.17 | M+FA-H | C13H24O3 | -2.13 | 96.79 | 11-Hydroxy-9-tridecenoic acid |
| 4.60 | 283.06 | M+FA-H | C15H10O3 | -1.23 | 97.59 | 3-Hydroxyflavone |
| 4.60 | 363.02 | M-H | C10H13N4O7PS | 1.06 | 97.67 | 6-Thioinosine-5'-monophosphate |
| 4.65 | 295.10 | M+H-H2O, M+H | C18H16O5 | 2.66 | 94.32 | Cabreuvin |
| 4.66 | 285.11 | M-H2O-H | C17H20O5 | 3.06 | 86.50 | p-HPEA-EDA |
| 4.72 | 373.19 | M-H, M+Cl, M+FA-H | C18H30O8 | -1.74 | 99.27 | 6-Epi-7-isocucurbic acid glucoside |
| 4.74 | 279.13 | M-H, M+Cl | C14H20N2O4 | -2.32 | 87.48 | Tyrosyl-Valine |
| 4.82 | 165.09 | M+H-H2O, M+H | C10H14O3 | 4.32 | 97.92 | Amyl 2-furoate |
| 4.83 | 171.10 | M-H2O-H, M-H | C9H16O3 | -3.22 | 97.34 | Tetrahydrofurfuryl butyrate |
| 4.95 | 298.20 | M+ACN+H | C14H24O4 | 3.07 | 98.56 | 5-Nonyltetrahydro-2-oxo-3-furancarboxylic acid |
| 5.02 | 379.21 | M+H-H2O | C21H32O7 | -0.74 | 93.12 | Isopetasoside |
| 5.09 | 320.15 | M+Cl | C17H23N3O | 1.70 | 85.98 | Mepyramine |
| 5.17 | 199.10 | M-H | C10H16O4 | -1.97 | 99.17 | cis-4-Decenedioic acid |
| 5.22 | 375.17 | M-H2O-H, M-H | C17H30O10 | -1.33 | 91.86 | cis-3-Hexenyl b-primeveroside |
| 5.24 | 377.17 | M+H-2H2O | C23H28N2O3S | 2.48 | 31.67 | Cinalukast |
| 5.37 | 398.25 | M+ACN+H | C19H32O6 | 1.12 | 94.76 | 5,7-Megastigmadien-9-ol glucoside |
| 5.42 | 231.08 | M+K | C12H16O2 | -3.45 | 98.88 | 2-Methyl-1-phenyl-2-propanyl acetate |
| 5.43 | 199.10 | M+FA-H | C9H14O2 | -4.48 | 97.71 | Methyl 2-octynoate |
| 5.43 | 165.09 | M+H-H2O, M+H | C10H12O2 | 4.78 | 95.75 | 2-Phenylbutyric acid |
| 5.45 | 419.23 | M+FA-H | C19H34O7 | -3.50 | 93.47 | Tsangane L 3-glucoside |
| 5.53 | 271.16 | M+FA-H | C13H22O3 | 0.16 | 98.24 | Methyl dihydrojasmonate |
| 5.53 | 417.16 | M+K | C23H26N2O3 | -1.69 | 92.71 | 4R-Hydroxy solifenacin |
| 5.62 | 167.11 | M+H-H2O, M+H, M+Na | C10H16O3 | 4.14 | 95.88 | (4S,8R)-8,9-Dihydroxy-p-menth-1(6)-en-2-one |
| 5.70 | 387.20 | M-H, M+Cl | C19H32O8 | -0.85 | 94.78 | Icariside B8 |
| 5.72 | 319.05 | M+Cl | C15H12N2O4 | 0.97 | 95.86 | Phenytoin catechol |
| 5.84 | 458.16 | M+H | C19H27N3O8S | 3.98 | 92.21 | 2-amino-4-({1-[(carboxymethyl)-C-hydroxycarbonimidoyl]-2-[(2,3-dihydroxy-1-phenylpropyl)sulfanyl]ethyl}-C-hydroxycarbonimidoyl)butanoic acid |
| 5.85 | 201.11 | M-H | C10H18O4 | -4.73 | 96.76 | Sebacic acid |
| 5.88 | 455.16 | M+Na | C24H29ClO5 | 4.42 | 72.63 | 15beta-hydroxycyproterone acetate |
| 5.89 | 245.05 | M-H | C10H14O5S | -2.39 | 95.15 | [3-(4-methoxyphenyl)propoxy]sulfonic acid |
| 5.98 | 283.19 | M+H-2H2O, M+H, M+H-H2O | C16H26O4 | 3.54 | 90.20 | Lactapiperanol C |
| 5.99 | 299.19 | M+FA-H | C15H26O3 | 3.52 | 97.51 | Lubiminol |
| 6.01 | 563.27 | M+FA-H | C25H42O11 | 1.01 | 92.99 | Blumenol C O-[rhamnosyl-(1->6)-glucoside] |
| 6.05 | 351.06 | M-H2O-H | C12H18O13 | -1.27 | 91.47 | 4-O-alpha-D-Galactopyranuronosyl-D-galacturonic acid |
| 6.12 | 269.04 | M-H | C15H10O5 | -2.76 | 95.94 | Apigenin |
| 6.12 | 349.00 | M-H2O-H | C15H12O9S | -1.88 | 95.10 | [3-(3,5,7-trihydroxy-4-oxo-3,4-dihydro-2H-1-benzopyran-2-yl)phenyl]oxidanesulfonic acid |
| 6.12 | 349.19 | M+Cl | C21H30O2 | 0.61 | 90.77 | Progesterone |
| 6.15 | 463.22 | M-H | C21H36O11 | 1.23 | 92.55 | Linalool oxide D 3-[apiosyl-(1->6)-glucoside] |
| 6.17 | 335.17 | M+FA-H | C14H26O6 | -1.33 | 98.32 | 1-Octen-3-yl glucoside |
| 6.20 | 364.18 | M+FA-H | C18H26ClN3 | 0.65 | 79.30 | Chloroquine |
| 6.21 | 300.22 | M+ACN+H | C14H26O4 | 3.93 | 97.52 | Tetradecanedioic acid |
| 6.31 | 387.20 | M+FA-H | C18H30O6 | -1.68 | 96.70 | 2,3-Dinor-6-keto-prostaglandin F1 a |
| 6.38 | 351.05 | M+FA-H | C15H14O5S | -0.41 | 97.58 | (3-oxo-1,3-diphenylpropoxy)sulfonic acid |
| 6.46 | 223.17 | M+H-H2O, M+H | C14H22O2 | 4.24 | 95.88 | Rishitin |
| 6.46 | 425.21 | M+Na, M+K | C20H34O8 | -1.00 | 98.16 | Acetyl tributyl citrate |
| 6.75 | 175.15 | M+H-H2O, M+H | C13H20O | 4.50 | 92.45 | 2,6-Diisopropyl-3-methylphenol |
| 6.76 | 210.11 | M+FA-H | C10H15NO | -4.85 | 97.08 | Pseudoephedrine |
| 6.76 | 270.17 | M-H2O-H | C14H27NO5 | -0.06 | 89.16 | 3-hydroxyhexanoyl carnitine |
| 6.77 | 565.29 | M-H | C28H38N8O5 | -4.77 | 89.28 | Hordatine A |
| 6.80 | 385.19 | M+FA-H | C19H24N4O2 | -1.87 | 86.38 | Pentamidine |
| 6.84 | 200.13 | M-H | C10H19NO3 | -4.34 | 96.72 | Capryloylglycine |
| 6.84 | 290.14 | M+Cl | C16H21N3 | 0.61 | 97.33 | Tripelennamine |
| 6.88 | 377.32 | M-H2O-H | C28H44O | 0.87 | 76.65 | Ergosterol |
| 6.93 | 212.13 | M+FA-H | C10H17NO | -2.28 | 97.55 | Myrtine |
| 7.03 | 653.35 | M+Na, M+ACN+H | C32H54O12 | 4.34 | 91.50 | Goshonoside F4 |
| 7.07 | 215.13 | M+FA-H | C10H18O2 | -0.06 | 96.62 | trans-Dec-2-enoic acid |
| 7.10 | 331.23 | M+H-H2O, M+H, M+H-2H2O | C21H32O4 | -0.75 | 93.41 | 9alpha-(3-Methyl-2E-pentenoyloxy)-4S-hydroxy-10(14)-oplopen-3-one |
| 7.10 | 365.23 | M+FA-H | C20H32O3 | -2.20 | 95.23 | 5,6-Epoxy-8,11,14-eicosatrienoic acid |
| 7.53 | 233.09 | M-H | C5H11O4P.[C5H8]n | -0.29 |  | Geranyl Phosphate |
| 7.75 | 162.02 | M-H2O-H | C5H11NO4S | -3.77 | 92.88 | Acamprosate |
| 7.84 | 213.19 | M+H-2H2O, M+H | C13H24O2 | 3.65 | 93.74 | 10-Undecenyl acetate |
| 7.84 | 387.20 | M-H | C19H32O8 | -1.59 | 98.29 | 5a,6a-Epoxy-7E-megastigmene-3a,9e-diol 3-glucoside |
| 7.84 | 487.13 | M+Cl | C23H29ClO7 | -2.84 | 81.51 | Melleolide M |
| 7.91 | 270.17 | M-H2O-H | C15H31NS2 | -4.19 | 90.71 | Dihydro-2,4,6-tris(2-methylpropyl)-4h-1,3,5-dithiazine |
| 8.10 | 224.13 | M+H, M+Na, M+H-H2O | C12H17NO3 | 4.11 | 95.37 | Cerulenin |
| 8.17 | 288.13 | M-H | C16H20ClN3 | 0.18 | 75.29 | Chloropyramine |
| 8.55 | 198.11 | M+FA-H | C9H15NO | -4.71 | 96.93 | psi-Pelletierine |
| 8.70 | 363.22 | M+FA-H | C20H30O3 | -1.73 | 96.81 | Leukotriene A4 |
| 8.73 | 242.14 | M-H2O-H | C12H23NO5 | -0.68 | 95.02 | hydroxyisovaleroyl carnitine |
| 8.84 | 356.15 | M-H2O-H, M+FA-H | C15H21NO6 | -1.67 | 48.57 | Domoic acid |
| 9.15 | 238.11 | M+FA-H | C11H15NO2 | -2.71 | 96.45 | (R)-N-Methylsalsolinol |
| 9.42 | 343.18 | M+FA-H | C16H26O5 | -1.69 | 97.59 | Artemether |
| 9.46 | 547.24 | M+FA-H | C24H38O11 | 4.28 | 94.08 | Eriojaposide A |
| 9.95 | 266.14 | M+FA-H | C13H19NO2 | -3.26 | 98.44 | Dioscorine |
| 11.15 | 179.18 | M+H-H2O, M+H | C13H24O | 4.98 | 91.41 | (Z)-4-Dodecenal |
| 11.16 | 371.21 | M-H, M+Cl, M-H2O-H | C19H32O7 | -1.91 | 98.48 | Blumenol C glucoside |
| 11.16 | 471.13 | M-H | C17H28O15 | -4.91 | 88.39 | 4-O-Methyl-a-D-glucosyl-(1->2)-b-D-xylosyl-(1->4)-D-xylose |
| 11.16 | 765.41 | M-H | C40H62O14 | -0.20 | 92.99 | (3b,5a,25R)-3-Hydroxyspirostan-6-one 3-[2-acetylarabinosyl-(1->6)-glucoside] |
| 11.17 | 319.19 | M+H-H2O, M+H, M+H-2H2O | C19H26O4 | 1.08 | 89.98 | Ubiquinone-2 |
| 11.46 | 221.15 | M+H-H2O, M+H, M+Na, M+H-2H2O | C12H22O2 | 4.04 | 94.84 | 5Z-Dodecenoic acid |
| 11.66 | 277.14 | M+FA-H | C15H20O2 | -1.46 | 95.77 | Pterosin O |
| 11.66 | 453.18 | M-H | C22H30O10 | -1.11 | 95.07 | alpha-CEHC glucuronide |
| 12.23 | 289.18 | M+H-H2O, M+Na | C18H26O4 | 1.18 | 85.85 | 5'-Carboxy-gamma-chromanol |
| 12.92 | 385.22 | M-H | C20H34O7 | -1.54 | 97.27 | 10,11-dihydro-20-trihydroxy-leukotriene B4 |
| 23.07 | 904.57 | M-H2O-H | C50H86NO12P | 1.77 | 63.01 | PS(DiMe(11,3)/DiMe(13,5)) |
| 23.16 | 465.31 | M-H | C27H46O4S | 3.30 | 91.11 | Cholesterol sulfate |
| 23.33 | 871.54 | M-H | C43H86O13P2 | -4.85 | 89.18 | PGP(a-13:0/i-24:0) |
